# VDR is a potential prognostic biomarker and positively correlated with immune infiltration: a comprehensive pan-cancer analysis with experimental verification

Xuedi Xia, Feng Xu, Dexing Dai, An Xiong, Ruoman Sun, Yali Ling, Lei Qiu, Rui Wang, Ya Ding, Miaoying Lin, Haibo Li, Zhongjian Xie\*

National Clinical Research Center for Metabolic Diseases, Hunan Provincial Key Laboratory of Metabolic Bone Diseases, and Department of Metabolism and Endocrinology, The Second Xiangya Hospital of Central South University, 139 Middle Renmin Road, Changsha, 410011, Hunan, China.

\* Correspondence:

Zhongjian Xie

[zhongjian.xie@csu.edu.cn](mailto:zhongjian.xie@csu.edu.cn)

**Keywords:** Vitamin D receptor, Pan-cancer, Prognosis, Immune infiltration, Tumor microenvironment

## 1 **Abstract**

2 The vitamin D receptor (VDR) is a transcription factor that mediates a variety of biological functions  
3 of 1,25-dihydroxyvitamin D<sub>3</sub>. Although there is growing evidence of cytological and animal studies  
4 supporting the suppressive role of VDR in cancers, the conclusion is still controversial in human  
5 cancers and no systematic pan-cancer analysis of VDR is available. We explored the relationships  
6 between VDR expression and prognosis, immune infiltration, tumor microenvironment or gene set  
7 enrichment analysis (GSEA) in 33 types of human cancers based on multiple public databases and R  
8 software. Meanwhile, the expression and role of VDR were experimentally validated in papillary  
9 thyroid cancer (PTC). VDR expression decreased in 8 types and increased in 12 types of cancer  
10 compared to normal tissues. Increased expression of VDR was associated with either good or poor  
11 prognosis in 13 cancer types. VDR expression was positively correlated with the infiltration of cancer-  
12 associated fibroblasts, macrophages, or neutrophils in 20, 12 and 10 cancer types respectively and this  
13 correlation was experimentally validated in PTC. Increased VDR expression was associated with  
14 increased percentage of stromal or immune components in tumor microenvironment (TME) in 24  
15 cancer types. VDR positively and negatively correlated genes were enriched in immune cell function  
16 and energy metabolism pathways respectively in the top 9 highly lethal tumors. Additionally, VDR  
17 expression was increased in PTC and inhibited cell proliferation and migration. In conclusion, VDR is  
18 a potential prognostic biomarker and positively correlated with immune infiltration as well as stromal  
19 or immune components in TME in multiple human cancers.

## 21 **Introduction**

22 Vitamin D is primarily recognized for its role in regulating calcium homeostasis and bone health. In

23 recent years, increasing number of studies have revealed that vitamin D has a wide range of potential  
24 extra-skeletal effects [1-4], such as anti-cancer effects [5]. VDR mediates the biological actions of  
25 1,25-dihydroxyvitamin D<sub>3</sub>. VDR is widely expressed in human tissues such as intestine, kidney, heart,  
26 brain, skin, prostate, and ovary [6]. Studies have shown that VDR inhibits tumor progression by  
27 suppressing cell stemness in pancreatic cancer and colitis-associated tumorigenesis in colon cancer [7,  
28 8]. Knockout of VDR increases carcinogen-induced mammary hyperplasia and tumor progression in  
29 the epidermis and lymphoid tissue in mice [9]. These observations suggest that VDR might serve as a  
30 tumor suppressor.

31  
32 Although the results of cytological studies and animal experiments are encouraging [10-12], the results  
33 of clinical studies are controversial. A number of clinical studies have demonstrated that higher  
34 expression of VDR is positively correlated with better prognosis or low TNM stage in breast cancer,  
35 colorectal cancer, papillary thyroid cancer, lung cancer, urothelial bladder cancer and childhood solid  
36 tumors [13-18]. Hypermethylation may lead to underexpression of VDR and is associated with  
37 unfavorable outcomes in pediatric adrenocortical tumors [19]. However, other investigators have  
38 reported conflicting results. Al-Azhri et al. have reported that VDR expression is not correlated with  
39 breast cancer survival outcomes [20]. Choi et al. have shown that higher expression of VDR mRNA is  
40 associated with worse clinical outcome in papillary thyroid cancer based on public multi-genomics  
41 data [21]. Sahin et al. have found that higher expression of VDR is associated with lower disease-free  
42 survival and greater tumor size in superficial transitional cell carcinoma of the bladder [22]. Meanwhile,  
43 the relationship between VDR expression and tumor characteristics in some cancers is still unclear.  
44 The role of VDR in tumor progression and tumor immunity remains to be elucidated.

45

46 Pan-cancer analysis is a new tool for assessing the role of interested genes in cancers [23-25]. To date,  
47 no pan-cancer analysis of the relationship between VDR and human cancers has been performed.  
48 Previous clinical studies have mostly focused on the association of VDR expression and polymorphism  
49 with patients' survival [26-28]. In the present study, we not only analyzed the relationship between  
50 VDR expression and clinical outcomes, but also analyzed genetic alterations and the association of  
51 VDR expression with immune infiltration, tumor microenvironment and gene set enrichment analysis  
52 in 33 types of human cancers based on multiple platforms including the Tumor Immune Estimation  
53 Resource, version 2 (TIMER2.0), the Gene Expression Profiling Interactive Analysis, version 2  
54 (GEPIA 2), cBioPortal, Gene Set Cancer Analysis (GSCA), LinkedOmics, the Tumor-immune System  
55 Interactions and Drugbank (TISIDB), The University of ALabama at Birmingham CANcer data  
56 analysis Portal (UALCAN) and R software. Furthermore, the expression and function of VDR were  
57 verified through in vitro experiments in PTC. This is the first pan-cancer analysis of VDR and the  
58 results provide new insights into the relationship between VDR and various types of cancers, thus may  
59 offer comprehensive references for further clinical research.

60

61 The 33 types of human cancers included in the present study were listed as follows: adrenocortical  
62 carcinoma (ACC), bladder urothelial carcinoma (BLCA), breast invasive carcinoma (BRCA), cervical  
63 squamous cell carcinoma and endocervical adenocarcinoma (CESC), cholangiocarcinoma (CHOL),  
64 colon adenocarcinoma (COAD), lymphoid neoplasm diffuse large B-cell lymphoma (DLBC),  
65 esophageal carcinoma (ESCA), glioblastoma multiforme (GBM), head and neck squamous cell  
66 carcinoma (HNSC), kidney chromophobe (KICH), kidney renal clear cell carcinoma (KIRC), kidney

67 renal papillary cell carcinoma (KIRP), acute myeloid leukemia (LAML), lower grade glioma (LGG),  
68 liver hepatocellular carcinoma (LIHC), lung adenocarcinoma (LUAD), lung squamous cell carcinoma  
69 (LUSC), mesothelioma (MESO), ovarian serous cystadenocarcinoma (OV), pancreatic adeno-  
70 carcinoma (PAAD), pheochromocytoma and paraganglioma (PCPG), prostate adenocarcinoma  
71 (PRAD), rectum adenocarcinoma (READ), sarcoma (SARC), skin cutaneous melanoma (SKCM),  
72 stomach adenocarcinoma (STAD), testicular germ cell tumors (TGCT), thyroid carcinoma (THCA),  
73 thymoma (THYM), uterine corpus endometrial carcinoma (UCEC), uterine carcinosarcoma (UCS),  
74 and uveal melanoma (UVM).

## 76 **Materials and Methods**

### 77 **Differential expression analysis**

78 The TIMER2.0 online tool (<http://timer.cistrome.org/>) is a comprehensive platform which provides  
79 cancer exploration methods [29]. The “Gene\_DE” module of “Exploration” was used to analyze the  
80 differential expression of VDR between cancers and adjacent normal tissues across all tumors in the  
81 cancer genome atlas (TCGA) database. The main algorithm of differential gene analysis was edgeR  
82 [30]. The differential expressions between tumors and adjacent tissues were analyzed by the Wilcoxon  
83 test. Supplementary data were obtained from the GEPIA 2 platform (<http://gepia2.cancer->  
84 [pkucn/#index](http://pkucn/#index)) when normal data were not available for some types of cancers [31]. The “Box Plot”  
85 function of “Expression DIY” was used to analyze the differences in VDR expression levels between  
86 tumors and adjacent normal tissues of tumors including ACC, DLBC, LAML, LGG, OV, SARC,  
87 SKCM, TGCT, THYM, and UCS. The GEPIA 2 platform was used to analyze differential signature  
88 score and the signature score was calculated by mean value of  $\log_2(\text{TPM} + 1)$  of gene. The statistical

89 method for differential analysis was one-way ANOVA ( $|\text{Log}_2\text{FC}|$  Cutoff = 1,  $p$ -value Cutoff = 0.05).

90

91 The cBioPortal for Cancer Genomics (<http://www.cbioportal.org/>) allows us to present the expression  
92 of VDR among different types of human cancers [32]. The “Plots” module was used and the tumor  
93 category was sorted according to the median of VDR expression levels. RNA-Seq by Expectation-  
94 Maximization (RESM) algorithm was used to analyze mRNA profile. The GSCA database  
95 (<http://bioinfo.life.hust.edu.cn/GSCA/#/>) integrates abundant genomic data across 33 cancer types  
96 from TCGA[33]. The “Expression” module was used to investigate the relationship between VDR  
97 expression and tumor pathologic stages. The pathologic stage of tumor samples was classified into 4  
98 stages including stage I, II, III and IV. The differences between the log2 RSEM expression of VDR in  
99 4 stages were analyzed by ANOVA test.

100

### 101 **Survival analysis**

102 Univariate COX regression analysis was used to analyze the relationship between VDR expression and  
103 overall survival (OS), progression free survival (PFS), disease specific survival (DSS), or disease free  
104 interval (DFI) in various cancers. The results were shown by forest plots based on R packages “survival”  
105 and “forestplot” (R software Version 4.1.1). The clinical data were obtained from UCSC Xena database  
106 [34] (<https://xenabrowser.net/datapages/>). The GSCA platform also provides information about clinical  
107 outcomes of different VDR expression levels in human cancers [35]. In order to further confirm and  
108 more intuitively demonstrate the relationship between VDR expression and survival, the “Expression  
109 & Survival” module was used to examine the relationship between VDR expression and OS, PFS, DSS,  
110 or DFI in human cancers. Cox Proportional-Hazards model and Logrank tests were used to analyze

111 the specific gene in every cancer.

112

### 113 **Genetic alteration and mutation analysis**

114 The cBioPortal platform was also used to analyze the genetic alterations across all TCGA tumors [32].

115 The “Cancer Types Summary” module was used to analyze the gene alteration frequency of VDR in

116 multiple cancers. The mutation sites of VDR were visualized in the schematic diagram and 3D

117 structure of protein through “Mutation” function. To further explore the relationship between gene

118 alterations and survival, we searched the name of each cancer with genetic alterations of VDR such as

119 “ACC” under “Comparison/Survival” module. The differences in the survival time between the VDR

120 altered group and the VDR unaltered group were shown.

121

### 122 **Immune infiltration analysis**

123 The correlations between VDR expression and abundance of multiple immune infiltrates including

124 natural killer (NK) cells, CD4+ T cells, CD8+ T cells, T regulatory cells (Tregs), B cells, cancer as-

125 sociated fibroblasts, macrophages, neutrophils, myeloid dendritic cells, and monocytes in various

126 tumors were analyzed by the “Gene” function under “Immune” module in the TIMER2.0 platform

127 [29]. The heatmaps based on purity-adjusted Spearman's rho were generated to show the association

128 between VDR expression and immune infiltration. Multiple algorithms including EPIC,

129 MCPCOUNTER, QUANTISEQ, XCELL, CIBERSORT, CIBERSORT-ABS, TIMER and TIDE were

130 used to estimate immune infiltration levels.

131

### 132 **Immune-related gene analysis**

133 The TISIDB platform (<http://cis.hku.hk/TISIDB/>) offers a plentiful resource for tumor-immune system  
134 interaction [36]. Spearman correlations between VDR expression and immune-related genes including  
135 immunoinhibitor, immunostimulator, MHCs, chemokine, or chemokine receptor were analyzed. A  
136 linear plot was generated after a single cancer and an immune modulator were chosen.

137

### 138 **Tumor microenvironment analysis**

139 The association between VDR expression and TME related pathway scores in various tumors was  
140 analyzed by Pearson's correlation and the result was shown by heatmap based on R software (Version  
141 4.1.1). The TME related pathway score was established by the principal component analysis algorithms  
142 [37]. StromalScore (the components of stromal cells), ImmuneScore (the components of immune cells),  
143 ESTIMATEScore (the sum of StromalScore and ImmuneScore), and TumorPurity were calculated by  
144 R package "ESTIMATE" algorithm [38]. The correlation between VDR expression and ESTIMATE  
145 analysis was computed via Pearson's correlation and visualized by heatmap and lollipop-diagrams.  
146 The data used for analysis were obtained from UCSC Xena database [34].

147

### 148 **Gene set enrichment analysis**

149 The LinkedOmics platform (<http://www.linkedomics.org/admin.php>) provides available multi-omics  
150 data from TCGA database and 10 Clinical Proteomics Tumor Analysis Consortium (CPTAC) cancer  
151 cohorts [39]. In order to probe into biological insights from the correlation, the "LinkInterpreter"  
152 module of the LinkedOmics database was used to perform enrichment analysis for the top 9 tumors in  
153 terms of estimated deaths based on cancer statistics published in 2022 [40]. Gene set enrichment  
154 analysis was performed for Kyoto Encyclopedia of Genes and Genomes (KEGG) pathway enrichment



155 analysis. The enrichment analysis was based on Pearson correlation test and the results were displayed  
156 in bar graphs.

157

## 158 **Cell culture**

159 The PTC cell lines K1 and BCPAP were respectively purchased from American type culture collection  
160 (ATCC) and China Center for Type Culture Collection (CCTCC). The human normal thyroid cell line  
161 Nthy-ori-3-1 was obtained from Cell Bio, Shanghai, China. All three cell lines were identified by STR  
162 profiling. K1 cells were cultured in high-glucose (4.5 g/L) Dulbecco's Modified Eagle Medium  
163 (DMEM), BCPAP cells were cultured in RPMI-1640 medium and Nthy-ori-3-1 cells were cultured in  
164 DMEM, nutrient mixture F-12 supplemented with 10% fetal bovine serum (FBS, Biological Industries,  
165 Israel), 100 units/ml penicillin and 100 µg/ml streptomycin (Biological Industries, Israel). All cells  
166 were cultured in an incubator maintained in 37°C and 5% CO<sub>2</sub>.

167

## 168 **Lentivirus infection**

169 A total number of  $1 \times 10^5$  K1 and BCPAP cells were plated in 6-well plates. K1 and BCPAP cells were  
170 transduced the lentiviral vector containing the puromycin resistance gene and VDR-shRNA or Control-  
171 shRNA (Genechem, Shanghai, China) at the multiplicity of infection (MOI) of 50 or 10 respectively  
172 for 16 h. After the cells were cultured in the complete medium for 72 h, the green fluorescence was  
173 observed to evaluate transfection efficiency under a luminescence microscope (Carl Zeiss Microscopy  
174 GmbH, Germany). Stably infected cells were selected by puromycin (Genechem, Shanghai, China) for  
175 2-3 days.

176

177 **Adenovirus transfection**

178 K1 and BCPAP cells were seeded in 6-well plates at  $3-5 \times 10^5$ /well. Cells were infected with  
179 adenovirus vector containing human VDR cDNA (VDR-adv) (Genechem, Shanghai, China) or  
180 negative control adenovirus (Control-adv) at MOI of 100 in the presence of enhanced infection solution  
181 (Genechem, Shanghai, China) for 12 h. Green fluorescence was observed after virus-infected cells  
182 were cultured in the complete medium for 72 h.

183  
184 **Patients and tissue samples**

185 PTC tissues and matched adjacent normal tissues were obtained from patients who underwent  
186 thyroidectomy at the Second Xiangya Hospital of Central South University. Specimens from 10  
187 patients were embedded in paraffin and used for immunohistochemistry. Specimens from other 27  
188 patients were snap-frozen in liquid nitrogen and used for the extraction of tissue RNA and protein. The  
189 study was approved by the ethics committee in the Second Xiangya Hospital of Central South  
190 University. All patients have signed a written informed consent form.

191  
192 **Western blot analysis**

193 The UALCAN database (<http://ualcan.path.uab.edu/>) was used to examine the expression levels of  
194 VDR according to different histology in thyroid carcinoma. The expression of VDR in PTC cell lines  
195 and tissues was further verified by western blot analysis. Detailed procedures of western blot analysis  
196 were performed as described previously [41]. The antibodies used were shown as follows: antibodies  
197 against VDR (D-6, sc-13133, Santa Cruz Biotechnology, 1:500), GAPDH (10494-1-AP, Proteintech,  
198 1:3000), HRP-conjugated affinipure goat anti-mouse IgG(H+L) (SA00001-1, Proteintech, 1:5000),

199 HRP-conjugated affini-pure goat anti-rabbit IgG(H+L) (SA00001-2, Proteintech, 1:5000).

200

### 201 **Quantitative real-time polymerase chain reaction (qRT-PCR)**

202 Total RNA was isolated from virus-infected K1 and BCPAP cells as well as PTC tissues and matched  
203 adjacent normal tissues using Trizol reagent (Invitrogen, USA) and reverse transcribed into cDNA by  
204 PrimeScript™ RT reagent Kit with gDNA Eraser (RR047A, Takara, Japan). qRT-PCR was  
205 subsequently performed using TB Green® Premix Ex Taq™ II (RR820A, Takara, Japan) as described  
206 previously [42]. The mRNA expression levels of VDR were quantified by the  $2^{-\Delta\Delta Cq}$  method. The  
207 average Cq values of VDR and fibroblast activation protein (FAP), CD68 or CD15 of the PTC tissues  
208 were used for correlation analysis. The primers used for qRT-PCR were listed below: VDR: forward  
209 primer 5'- TCTCCAATCTGGATCTGAGTGAA-3' and reverse primer 5'-  
210 GGATGCTGTAAGTACCAGGT-3', GAPDH: forward primer 5'-  
211 TGATGACATCAAGGTGGTGAAG-3' and reverse primer 5'-  
212 TCCTTGGAGGCCATGTGGGCCAT-3', FAP: forward primer 5'-  
213 ATGAGCTTCCTCGTCCAATTCA-3' and reverse primer 5'-AGACCACCAGAGAGCATATTTTG-  
214 3', CD68: forward primer 5'- GGAAATGCCACGGTTCATCCA-3' and reverse primer 5'-  
215 TGGGGTTCAGTACAGAGATGC-3', CD15: forward primer 5'- GATCTGCGCGTGTGGACTA-  
216 3' and reverse primer 5'-GAGGGCGACTCGAAGTTCAT-3'.

217

### 218 **Immunohistochemistry (IHC)**

219 The human thyroid cancer specimens were obtained from 10 patients with PTC at the Second Xiangya  
220 Hospital of Central South University in China. The paraffin-embedded cancer tissues were cut into 4-

221  $\mu\text{m}$  thick sections. Tissue sections were dewaxed in xylene and rehydrated in ethanol with a gradually  
222 decreased concentration. Antigen retrieval was conducted by 0.25% trypsin with EDTA for 30 min at  
223 37°C and then endogenous peroxidase activity was blocked by 0.3 % hydrogen peroxide for 20 min at  
224 room temperature. Sections were blocked with 5% bovine serum albumin for 1 hour and incubated  
225 with the primary antibody for VDR (1:50 dilution, sc-13133, Santa Cruz Biotechnology) overnight at  
226 4°C. After washing 3 times with phosphate-buffered saline the next day, the sections were incubated  
227 the secondary antibody for 30 min at 37°C (PV-9000, ZSGB-BIO, China). Subsequently, the slides  
228 were stained separately by 3,3'-diaminobenzidine (DAB, ZLI-9018, ZSGB-BIO, China) and  
229 hematoxylin (G1004, Servicebio, China). Images were taken by a microscope (Olympus CX31, Tokyo,  
230 Japan) magnified  $\times 400$ . ImageJ software (National Institutes of Health, the United States) was used to  
231 calculate average optical density (AOD, integrated option density/ area). The average AOD of the five  
232 visual fields was used for analysis.

233

#### 234 **Cell counting kit-8 (CCK-8) assay**

235 K1 and BCPAP cells transfected by lentivirus and adenovirus were seeded into 96-well plates at a  
236 density of  $2 \times 10^3$  cells per well in 100  $\mu\text{l}$  complete medium. Each group had four replicates. After cells  
237 were cultured for 0, 24, 48, 72 and 96 h, 10  $\mu\text{l}$  CCK-8 reagent (BS350B, Biosharp, China) and 90  $\mu\text{l}$   
238 basic medium were added into each well and incubated for 2 h at 37 °C. The optical density value (OD  
239 value) was measured at 450 nm by a microplate reader (Bio-Tek Instruments, Inc., the United States).

240

#### 241 **Colony formation assay**

242 After transfection with the lentivirus and adenovirus, K1 and BCPAP cells were seeded into 6-well

243 plates (1000 cells/ well) and cultured for 14 days. The culture medium was changed every 2-3 days.  
244 The colony numbers were analyzed by ImageJ software (National Institutes of Health, the United  
245 States) after the cells were fixed with 4% paraformaldehyde and stained with 0.1% crystal violet  
246 solution for 10 min.

247

### 248 **Transwell migration assay**

249 Transfected K1 and BCPAP cells were seeded into the upper chamber at  $5 \times 10^4$  in 200  $\mu$ L serum-free  
250 medium and 600  $\mu$ L complete medium (10% FBS) were added into the lower chamber of Transwell  
251 plates (3422, Corning, pore size: 8.0  $\mu$ m). After the cells were subsequently incubated at 37°C for 48  
252 h, the membranes were fixed with 4% paraformaldehyde and stained with 0.1% crystal violet for 10  
253 min. The cells remaining on the upper membrane were removed gently with cotton swabs and  
254 migration cells were observed and photographed using a light microscope (Olympus CX31, Tokyo,  
255 Japan). Migration cells in three fields of each chamber were counted by ImageJ software (National  
256 Institutes of Health, the United States).

257

### 258 **Statistical methods**

259 GraphPad Prism version 7.0 (GraphPad Software, USA) was used for data analysis. Experimental data  
260 were presented as mean  $\pm$  standard deviation (SD) and compared by the Student's t-test or analysis of  
261 variance (ANOVA) and simple linear regression was performed to calculate the correlation.  $P < 0.05$   
262 was considered statistically significant.

263

### 264 **Results**

265 **VDR expression was decreased in 8 types and increased in 12 types of cancer when compared**  
266 **with adjacent normal tissues**

267 We first analyzed differential expression of VDR between tumors and adjacent normal tissues across  
268 all tumors in TCGA database. The abbreviations and full names of the 33 types of human cancers  
269 included in the present study and changes of expression in these cancers were provided in **Table 1**.

270 When compared with matched normal tissues, the expression levels of VDR were lower in COAD,  
271 KIRC, KIRP, PCPG, PRAD, and READ and higher in tumor tissues of BRCA, CESC, CHOL, ESCA,  
272 HNSC, KICH, LIHC, LUAD, STAD, THCA, and UCEC (**Figure 1A**). For some types of tumors  
273 including ACC, DLBC, LAML, LGG, OV, SARC, SKCM, TGCT, THYM, and UCS, normal tissue  
274 data were matched from TCGA and genotype-tissue expression (GTEx) databases. As shown in **Figure**  
275 **1B**, VDR was lower expression in SKCM, THYM and higher expression in OV than adjacent normal  
276 tissues. However, the data of VDR expression in MESO and UVM were not available and not shown.

277  
278 Since VDR is widely expressed in human tissues, we next examined VDR expression in various types  
279 of cancers. As shown in **Figure 1C**, VDR was also widely expressed in human cancers especially in  
280 tumors of digestive system and endocrine system. The relationship between VDR expression and  
281 pathologic stages of various tumors was analyzed by ANOVA test. As shown in **Figure 1D**, the  
282 expression of VDR varied between different pathological stages of the following tumors: HNSC ( $p <$   
283  $0.01$ ; FDR = 0.09), KICH ( $p < 0.05$ ; FDR = 0.35), TGCT ( $p < 0.05$ ; FDR = 0.10) and THCA ( $p = 0.05$ ;  
284 FDR = 0.13). Interestingly, the expression of VDR was increased in early stage (from stage I to stage  
285 II) but decreased in late stage (from stage II to stage III or IV) in KICH and TGCT. No association was  
286 observed between VDR expression and pathologic stages in other tumors such as CHOL and ACC

287 **(Supplementary Figure S1).**

288

289 **Increased expression of VDR was associated with either good prognosis in CHOL, SKCM, KIRC,**  
290 **ESCA, and OV or poor prognosis in LGG, GBM, LAML, KIRP, UVM, PAAD, ACC, and THCA**

291 In order to determine the association between VDR expression levels and clinical outcomes, we  
292 analyzed the relationship between VDR expression and OS, PFS, DSS, or DFI by R software. As  
293 shown in **Figure 2**, higher expression of VDR was associated with better OS in KIRC, better PFS in  
294 KIRC, CHOL and ESCA, better DSS in KIRC and ESCA, or better DFI in OV. However, lower  
295 expression of VDR was associated with better OS in LGG, GBM, LAML, PAAD, and VUM. The  
296 results of PFS analysis showed that higher expression of VDR was associated with worse prognosis in  
297 patients with LGG, GBM, UVM, PAAD, and ACC. Furthermore, VDR expression was negatively  
298 correlated with DSS in LGG, GBM, PAAD, UVM and DFI in PAAD or THCA. In addition, we  
299 conducted survival analysis of OS, PFS, DSS, and DFI across 33 cancer types from TCGA database  
300 based on the GSCA platform. As demonstrated in **Supplementary Figure S2**, the results were  
301 consistent with the data of OS in LGG, GBM, LAML, PAAD, UVM and the data of PFS in LGG,  
302 GBM, UVM which were analyzed by R software. Besides, higher expression of VDR was associated  
303 with better OS, PFS, DSS, DFI in CHOL and better DSS in SKCM but poor PFS in KIRP. To sum up,  
304 increased expression of VDR was associated with good prognosis in CHOL, SKCM, KIRC, ESCA,  
305 and OV but poor prognosis in LGG, GBM, LAML, KIRP, UVM, PAAD, ACC, and THCA.

306

307 **VDR genetic alterations and negative association with survival in ACC, LUAD, and OV**

308 Genetic alterations which are frequently occurred in various tumors are thought to participate in cancer

309 initiation and progression [43]. Therefore, we explored genetic alterations of VDR in TCGA pan-  
310 cancer atlas. The alteration types included mutation, structural variant, amplification, and deep deletion  
311 in various cancers, among which amplification was the most common type (**Figure 3A**). The highest  
312 alteration frequency (> 6%), including VDR mutation and amplification, occurred in uterine corpus  
313 endometrial carcinoma. All alteration types of VDR were found in stomach adenocarcinoma and  
314 amplification of VDR was observed in all uterine carcinosarcoma and sarcoma. No genetic alteration  
315 was found in some types of tumors including cholangiocarcinoma, kidney renal papillary cell  
316 carcinoma, mesothelioma, thymoma, thyroid carcinoma, and uveal melanoma. The mutation sites of  
317 VDR protein were shown in 3D structure (**Figure 3B**) and schematic diagram (**Figure 3C**). As shown  
318 in the figure, mutations of VDR were composed of missense, truncating, splice and SV/Fusion, among  
319 which the missense mutation was the major type. Thereinto, the mutation site R208C with the highest  
320 alteration frequency was found in astrocytoma and uterine endometrioid carcinoma. Furthermore, we  
321 analyzed the correlations between VDR genetic alterations and the clinical outcomes across multiple  
322 tumors. The results with statistical differences between altered group and unaltered group of VDR  
323 were shown in **Fig. 3D**. The altered group of VDR showed poor OS in ACC ( $p = 0.0461$ ) and LUAD  
324 ( $p = 0.0207$ ), poor DSS in ACC ( $p = 0.0265$ ) and LUAD ( $p = 0.0227$ ), or poor PFS in ACC ( $p = 0.0144$ )  
325 and OV ( $p = 0.0177$ ).

326

### 327 **Positive relationships between VDR expression and immune infiltration of cancer-associated** 328 **fibroblasts, macrophages or neutrophils in 20, 12 and 10 types of human tumors respectively**

329 We analyzed the relationships between VDR expression and immune infiltration levels of NK cells,  
330 CD4<sup>+</sup> T cells, CD8<sup>+</sup> T cells, Tregs, B cells, cancer related fibroblasts, macrophages, neutrophils,



331 myeloid dendritic cells and monocytes in various cancer types in TCGA database. The correlation  
332 between immune infiltration and VDR expression was analyzed by diverse algorithms like TIMER,  
333 EPIC and XCELL. As shown in **Figure 4**, VDR expression was positive correlated with infiltration of  
334 cancer associated fibroblasts in BLCA, BRCA, CESC, CHOL, GBM, HNSC, LGG, LIHC, LUAD,  
335 LUSC, MESO, OV, PAAD, PCPG, PRAD, SARC, SKCM, TGCT, THCA, THYM and infiltration of  
336 macrophages in GBM, HNSC, LGG, LUAD, LUSC, PAAD, PRAD, SARC, SKCM, TGCT, THCA,  
337 THYM and infiltration of neutrophils in BLCA, CESC, COAD, GBM, KIRC, KIRP, LUAD, LUSC,  
338 SARC, THCA based on all or more than half of the algorithms. Furthermore, a positive correlation  
339 between VDR expression and infiltration of CD8+ T cells in UVM and infiltration of Tregs in THCA  
340 was also shown in **Figure 4**.

341  
342 **Positive associations between VDR expression and various immune-related genes especially in**  
343 **TGCT and GBM**

344 We analyzed the interaction between VDR expression and immune-related genes in TCGA database.  
345 Correlations between VDR expression and numerous immunomodulators were shown in **Figure 5**.  
346 The rho values of Spearman's correlation were provided in **Supplementary Table S1**. The value  
347 greater than 0 indicated a positive correlation while less than 0 indicated a negative correlation. The  
348 top 3 strongest correlations were presented by scatter diagrams. The expression of VDR was positively  
349 correlated with C10orf54, tumor necrosis factor TNF receptor superfamily member 13 (TNFRSF13)  
350 in TGCT or interleukin-2  $\alpha$ -chain receptor (IL2RA) in GBM for immunostimulators (**Figure 5A**).  
351 Positive correlations between VDR expression and immunoinhibitors of colony stimulating factor 1  
352 receptor (CSF1R), galectin-9 (LGALS9) in TGCT, or GSF1R in GBM were shown in **Figure 5B**.

353 Besides, VDR expression was positively associated with major histocompatibility complexes (MHCs)  
354 of beta2-microglobulin (B2M), human leukocyte antigen-A (HLA-A) and tapasin binding protein  
355 (TAPBP) in TGCT (**Figure 5C**). As for chemokine and chemokine receptor, VDR expression was  
356 positively correlated with C-C motif chemokine ligand 2 (CCL2), C-C motif chemokine receptor 1  
357 (CCR1), C-C motif chemokine receptor 2 (CCR2), and C-C motif chemokine receptor 5 (CCR5) in  
358 GBM or C-C chemokine ligand 22 (CCL22), C-X-C motif chemokine ligand 16 (CXCL16) in TGCT  
359 (**Figure 5D, 5E**). Positive correlations between VDR expression and a great number of  
360 immunomodulators were also shown in **Figure 5**. The results suggest that increased expression of  
361 VDR is associated with increased expressions of various immune-related genes in multiple tumors  
362 particularly in GBM and TGCT.

363

#### 364 **Positive correlations between VDR expression and proportion of stromal or immune components** 365 **in tumor microenvironment in 24 types of human cancers**

366 Tumor microenvironment is thought to be potential therapeutic target in many types of cancers in  
367 recent years, thus we analyzed the correlation between VDR expression and tumor microenvironment.  
368 As shown in **Figure 6A**, VDR expression was positively associated with TME related pathways  
369 including antigen processing machinery and CD8<sup>+</sup> T effector as well as nucleotide excision repair,  
370 DNA damage response and base excision repair in various tumors such as UVM, PAAD, OV, PRAD,  
371 and DLBC. A strong positive correlation between VDR expression and antigen processing machinery  
372 in TGCT was observed. In addition, VDR expression had a positive relationship with StromalScore,  
373 ESTIMATEScore or ImmuneScore while was negatively correlated with TumorPurity in TGCT, GBM,  
374 LAML, DLBC, LUSC, LGG, SARC, PAAD, CHOL, UCS, PRAD, OV, LUAD, SKCM, UVM, THCA,

375 BLCA, MESO, HNSC, PCPG, LIHC, BRCA, CESC and UCEC (**Figure 6B, 6C**). The results indicated  
376 that high VDR expression was related to high stromal components or immune components in the  
377 aforementioned tumors. These data reveal that VDR may play a significant role in regulating tumor  
378 microenvironment.

379

380 **VDR positively and negatively correlated genes were enriched in immune cell function and**  
381 **energy metabolism pathways respectively in the top 9 highly lethal tumors**

382 We also conducted GSEA analysis to further explore VDR related KEGG pathways in the top 9 tumors  
383 with high estimated mortality rates. The correlations between VDR expression and co-expressed gene  
384 related KEGG pathways in LUAD, PRAD, BRCA, COAD, PAAD, LIHC, OV, LAML, and UCEC  
385 were analyzed. As shown in **Figure 7A-F** and **Supplementary Figure S3**, VDR positively associated  
386 genes were enriched in immune related pathways such as Th1, Th2 differentiation in LUAD, PRAD,  
387 LIHC, OV, UCEC and cytokine-cytokine receptor interaction in PRAD, PAAD, OV, UCEC. On the  
388 contrary, VDR negatively associated genes were involved in energy metabolism related pathways such  
389 as glyoxylate and dicarboxylate metabolism in BRCA and PAAD as well as oxidative phosphorylation  
390 in PRAD, COAD, PAAD, LIHC and UCEC.

391

392 **VDR expression was upregulated in PTC and the expression of VDR was positively correlated**  
393 **with the expression of cancer-associated fibroblast, macrophage and neutrophil markers in PTC**

394 To determine the expression of VDR in thyroid carcinoma, firstly, we used the UALCAN platform to  
395 explore the mRNA expression of VDR in THCA based on tumor histology. The results showed that  
396 the expression of VDR was upregulated in classical thyroid papillary carcinoma, tall thyroid papillary

397 carcinoma and follicular thyroid papillary carcinoma (**Figure 8A**). The elevated expression of VDR  
398 was verified in PTC cell lines including K1 and BCPAP cells when compared to normal thyroid cell  
399 line Nthy-ori-3-1 (**Figure 8B** and **Supplementary Figure S4, S5**). VDR was expressed in the nucleus  
400 in adjacent non-tumor tissues, but mainly located in the cytoplasm and cell membrane and showed  
401 stronger staining in PTC tissues (**Figure 8C, 8D**). In addition, VDR expression was increased in PTC  
402 tissues compared with matched adjacent non-tumor tissues at the mRNA and protein levels (**Figure**  
403 **8E, 8F** and **Supplementary Figure S6, S7**). In order to validate the correlation between VDR  
404 expression and immune infiltration, the expression of VDR and cell markers including FAP (cancer-  
405 associated fibroblast marker), CD68 (macrophage marker) and CD15 (neutrophil marker) in PTC  
406 tissues was examined by qRT-PCR [44-47]. The results showed that VDR expression was positively  
407 correlated with the expression of FAP, CD68 and CD15 in PTC tissues (**Figure 8G-I**).

408

#### 409 **Knockdown of VDR promoted proliferation and migration of PTC cells**

410 To determine the role of VDR in thyroid carcinoma cells, the expression levels of VDR in K1 and  
411 BCPAP cells were downregulated by using lentivirus and cell proliferation and migration was  
412 examined. As shown in **Figure 9A** and **Figure 9B**, the efficiency of VDR knockdown was about 50%-  
413 70%. CCK-8 assay showed that VDR knockdown promoted K1 and BCPAP cell proliferation (**Figure**  
414 **9C, 9D**). These results were confirmed by colony formation assay (**Figure 9E, 9F**). Transwell assay  
415 showed that the knockdown of VDR accelerated K1 and BCPAP cell migration (**Figure 9G, 9H**).  
416 These results indicate that VDR suppresses proliferation and migration of PTC cells.

417

#### 418 **Overexpression of VDR inhibited proliferation and migration of PTC cell lines**

419 In order to further confirm the suppressive role of VDR in tumor, VDR was overexpressed by  
420 adenovirus in K1 and BCPAP cells. As shown in **Figure 10A**, the mRNA expression levels of VDR  
421 were both increased by more than 100 folds in K1 and BCPAP cells. The transfection efficiency of  
422 VDR was over 90% (Green fluorescence) and the virus-infected cells grew well (**Figure 10B**). The  
423 results indicated that VDR overexpression reduced the proliferation in K1 and BCPAP cells through  
424 CCK-8 assay (**Figure 10C, 10D**) and colony formation assay (**Figure 10E, 10F**). Transwell assay also  
425 showed that up-regulated expression of VDR suppressed the migration of K1 and BCPAP cells (**Figure**  
426 **10G, 10H**).

427

## 428 **Discussion**

429 As far as we know, this is the first pan-cancer study to analyze VDR expression and the association  
430 with clinical outcomes, immune infiltration, tumor microenvironment and gene set enrichment based  
431 on online databases and R software across 33 types of human cancers. This comprehensive pan-cancer  
432 analysis revealed the potential role of VDR in tumor progression and tumor immunity.

433

434 The present study showed that the expression of VDR was downregulated in 8 types of human cancers  
435 including COAD, KIRC, KIRP, PCPG, PRAD, READ, SKCM, and THYM when compared to  
436 adjacent normal tissues. In addition, VDR expression was upregulated in 12 types of human cancers  
437 including BRCA, CESC, CHOL, ESCA, HNSC, KICH, LIHC, LUAD, OV, STAD, THCA, and UCEC  
438 The heterogeneity may be due to a relatively small number of normal tissues or different mechanisms  
439 of VDR in various tumors. There have been reported that the expression of VDR is decreased in  
440 colorectal adenocarcinoma and renal clear cell cancer and increased in breast invasive carcinoma,

441 ovarian tumor, and thyroid papillary carcinoma [13, 48-51]. Furthermore, the expression of VDR was  
442 affected by the degree of tumor differentiation. Previous studies have shown that VDR expression  
443 decreases with tumor dedifferentiation in esophageal adenocarcinoma and increased malignant degree  
444 in thyroid carcinoma [52, 53]. Besides, VDR is abundantly expressed in cancer tissues with high  
445 levels of differentiation but has low or undetectable levels of expression in cancer tissues with  
446 moderate or low levels of differentiation in pancreatic carcinoma [28]. The present study also  
447 demonstrated that the expression of VDR varied between different pathological stages in HNSC, KICH,  
448 TGCT, and THCA. Especially in KICH and TGCT, VDR expression increased in the early stage but  
449 decreased in the late stage, which may be attributed to the compensatory role of VDR in early tumor  
450 progression and the lost of compensatory effect in the advanced stage.

451  
452 Survival analysis showed that higher expression of VDR was associated with more favorable prognosis  
453 in CHOL, SKCM, KIRC, ESCA and OV. Similar results for CHOL have been reported in previous  
454 studies [54]. In contrast, higher expression of VDR was associated with poorer prognosis in LGG,  
455 GBM, LAML, KIRP, ACC, PAAD, UVM and THCA. Wang et al. have found that a lower expression  
456 of VDR is associated with worse outcomes in PAAD and Salomón et al. have demonstrated that higher  
457 VDR expression is correlated with better survival in GBM [28, 55]. Moreover, Huss et al. have reported  
458 high expression of VDR is a positive prognostic factor in BRCA [13]. The clinical outcomes of cancer  
459 patients are influenced by many confounding factors such as age, comorbidity, basic health status and  
460 degree of tumor malignancy, different studies may get inconsistent results due to different populations  
461 and baselines of patients. Although there have been inconsistent conclusions about the relationship  
462 between VDR expression levels and survival in some types of tumors, the present study revealed that

463 genetic alterations of VDR were associated with significantly reduced survival in ACC, LUAD and  
464 OV.

465

466 It is known that the immune system plays an essential role in cancer initiation and progression [56, 57].  
467 Integrated analyses of immune infiltration and immunomodulators in tumors have provided novel  
468 insights into understanding the effect of immune system on tumor growth [58-60]. Our results showed  
469 that VDR expression was positively correlated with infiltration of cancer associated fibroblasts,  
470 macrophages or neutrophils in 20, 12 and 10 types of human tumors respectively. The positive  
471 correlations of VDR expression with the expression of FAP (cancer-associated fibroblast marker),  
472 CD68 (macrophage marker) or CD15 (neutrophil marker) were experimentally verified in PTC tissues.  
473 Moreover, VDR expression was positively correlated with multifarious immunomodulators especially  
474 in GBM and TGCT in the present study. These results suggested that VDR may regulate immune  
475 response during tumor progression. Previous studies have focused on the cancer-promoting role of  
476 cancer associated fibroblasts, however, latest studies have suggested tumor-inhibitory capabilities for  
477 cancer associated fibroblast subpopulations based on the cellular heterogeneity analysis [61, 62]. It has  
478 been reported that high expression of VDR in tumor stromal fibroblasts was correlated with favorable  
479 prognosis in colorectal cancer [14]. In addition, macrophages and neutrophils are mostly from VDR  
480 positive hematopoietic precursor [63]. According to the degree of activation, macrophages are divided  
481 into M1 macrophages and M2 macrophages. M1 macrophages promote tumor eradication while M2  
482 macrophages contribute to tumor progression. Similarly, neutrophils manifested anti-tumor and pro-  
483 tumor properties. Szczerba et al. have shown that neutrophils accelerate cell cycle progression and  
484 extend the metastatic potential in circulating tumor cells while Governa et al. have demonstrated that

485 neutrophils consolidate the responsiveness of CD8<sup>+</sup> T cells and facilitate antineoplastic immunity in  
486 colorectal cancer [64, 65]. Due to immune cells such as macrophages have been shown to have  
487 opposing functions in regulating cancer progression, the definitive roles of VDR in tumor immunity  
488 remains to be further elucidated.

489  
490 Tumor microenvironment, which is mainly composed of immune and stromal components, is  
491 associated with progression and prognosis of tumors [66, 67]. A variety of algorithms have been  
492 exploited to estimate the components of immune and stromal cell such as ESTIMATE, TIMER and  
493 CIBERSORT [68-70], among which ESTIMATE algorithm is a reliable and an effective method that  
494 has been widely implemented [71, 72]. The higher ImmuneScore, StromalScore and ESTIMATEScore  
495 are, the higher the stromal and immune cell proportion and the less tumor purity in the tumor  
496 microenvironment are [73]. High tumor purity is considered to be associated with high risk or poor  
497 clinical outcomes in some cancers such as skin cutaneous melanoma and colorectal cancer [74, 75].  
498 The present study showed that VDR expression had a positive relationship with StromalScore,  
499 ESTIMATEScore or ImmuneScore while it was negatively correlated with TumorPurity in 24 types of  
500 human cancers including TGCT, GBM, LAML, DLBC, LUSC, LGG, SARC, PAAD, CHOL, UCS,  
501 PRAD, OV, LUAD, SKCM, UVM, THCA, BLCA, MESO, HNSC, PCPG, LIHC, BRCA, CESC and  
502 UCEC. The results from the present studies indicate that VDR may participate in regulating the  
503 proportion of immune and stromal cells in tumor microenvironment. Therefore, it may be possible to  
504 use VDR agonists to reshape the tumor microenvironment for anti-tumor purposes.

505  
506 VDR, as a transcription factor, is widely expressed in multiple tumor tissues and regulates the



507 expression of a variety of downstream signaling molecules. Gene enrichment analysis data in the  
508 present study revealed that VDR may potentially influence immune regulation including Th1/Th2 cell  
509 differentiation, T/B receptor/chemokine signaling pathway, cytokine-cytokine receptor interaction,  
510 complement and coagulation cascades, or NK cell mediated cytotoxicity in tumors. By analyzing the  
511 known VDR transcription factor binding sites, Singh et al. have found that VDR peaks are enriched  
512 for SNPs linked to immune phenotypes, indicating that the immuno-modulatory functions are the main  
513 effect of VDR [76]. However, how VDR affects tumor progression through immunity remains to be  
514 determined. Our studies also showed that VDR negatively correlated genes were involved in  
515 metabolism-related pathways encompassing protein export, RNA transport, carbon metabolism,  
516 glyoxylate and dicarboxylate metabolism, tyrosine metabolism, arginine and proline metabolism, or  
517 fatty acid metabolism in cancer tissues, suggesting that VDR inhibits tumor growth possibly via  
518 suppressing energy metabolism.

519  
520 Thyroid carcinoma is the most common malignant neoplasm in the endocrine system. The higher  
521 expression of VDR in PTC was confirmed in the present study when compared with normal thyroid  
522 and the result was consistent with the UALCAN database. The immunohistochemical results showed  
523 that VDR was mainly expressed in the cytoplasm and cell membrane in PTC tissues. The cytoplasmatic  
524 or membranous expression of VDR has also been found in other tumors such as breast cancer and  
525 ovarian cancer [13, 77]. It is now believed that VDR localized in the nucleus regulates gene  
526 transcription (genomic response), while VDR localized in the cytoplasm and cell membrane plays a  
527 role in rapid signal transduction (non-genomic response) [78, 79]. The proliferation and migration of  
528 K1 and BCPAP cells were promoted after VDR expression was down-regulated by lentivirus.

529 Moreover, the proliferation and migration of K1 and BCPAP cells were significantly inhibited after  
530 VDR expression was overexpressed by adenovirus. Other studies in vitro have also indicated that VDR  
531 suppresses cell proliferation in colon cancer and VDR participates the inhibition of epithelial-  
532 mesenchymal transition in human laryngeal squamous cell carcinoma [80, 81]. However, our survival  
533 analysis manifested that upregulation of VDR was associated with poor survival in thyroid carcinoma  
534 which was sync with the research performed by Choi et al based on public multigenomics data [21].  
535 The discrepancy between in vitro experiments and clinical data is affected by multiple factors. Tumors  
536 are in a more complex environment in the human body and the results of clinical studies are affected  
537 by individual differences.

538  
539 Nevertheless, there are still some limitations. The present study was mainly based on public databases  
540 and preliminary cell experiments, further in vivo experiments and prospective cohorts are required to  
541 gain a deeper understanding of the role and molecular mechanisms of VDR in tumor progression  
542 especially in the regulation of immune response and tumor microenvironment.

## 544 **Conclusion**

545 This first pan-cancer analysis of VDR indicates that VDR may serve as a prognostic biomarker and  
546 VDR is positively associated with immune infiltration as well as stromal or immune components in  
547 the tumor microenvironment in multiple human cancers. VDR positively correlated genes are enriched  
548 in immune cell function pathways while negatively correlated genes are involved in energy metabolism  
549 pathways in the top 9 highly lethal tumors. The expression of VDR is increased in PTC cells and tissues  
550 and VDR inhibits the proliferation and migration of PTC cells. In addition, the positive correlations

551 between VDR expression and the expression of cancer-associated fibroblast, macrophage and  
552 neutrophil markers are experimentally verified in PTC. The present study provides new insights into  
553 the potential roles of VDR in tumor progression and tumor immunity in human cancers, thus laying  
554 the foundation for further studies.

555

### 556 **Data Availability**

557 The data generated during and/or analyzed during the current study are available from the  
558 corresponding author on reasonable request.

559

### 560 **Author Contributions**

561 Conceptualization and design: X.X. and F.X.; methodology and analysis: X.X., D.D. and A.X.;  
562 software: M.L. and H.L.; validation: R.S., Y.L. and L.Q.; visualization: R.W. and Y.D.; writing: X.X.;  
563 experiments: X.X.; supervision: F.X. and Z.X. All authors contributed to the article and approved the  
564 submitted version.

565

### 566 **Funding**

567 This work was supported by the National Key R&D Program of China (No.2021YFC2501700), the  
568 National Natural Science Foundation of China (No.81672646 and No.82171580), the Hunan  
569 Provincial Natural Science Foundation of China (No.2021JJ30035) and the Key Research and  
570 Development Program of Hunan Province (No.2019SK2253).

571

### 572 **Acknowledgments**

573 We thank the developers of public databases for providing us with good platforms for data analysis.

574 We thank Liyan Liao and Feng Wu for their support in immunohistochemistry.

575

## 576 **Conflict of Interest**

577 The authors have no competing interests to declare that are relevant to the content of this article.

578

## 579 **Ethics Statement**

580 The experiment involving human specimens was approved by the ethics committee in the Second  
581 Xiangya Hospital of Central South University and was performed in accordance with the World  
582 Medical Association Declaration of Helsinki. Written informed consent was obtained from all  
583 individual participants included in the study.

584

## 585 **Supplementary Material**

586 **Supplementary Figure S1:** VDR mRNA expression in different pathologic stages of various cancers  
587 ( $p > 0.05$ ).

588 **Supplementary Figure S2:** The associations between VDR expression levels and clinical outcomes.  
589 Kaplan-Meier analysis of the associations between VDR expression and (a) OS, (b) PFS, (c) DSS, or  
590 (d) DFI were carried out by the GSCA online tool.

591 **Supplementary Figure S3:** Gene set enrichment analysis of VDR in OV, LAML and UCEC.

592 **Supplementary Figure S4, S5:** Original data of Western blot for GAPDH and VDR (Figure 8B).

593 **Supplementary Figure S6, S7:** Original data of Western blot for GAPDH and VDR (Figure 8F).

594 **Supplementary Table S1:** The rho values of Spearman's correlation between VDR and immune-

595 related genes.

596

## 597 **Abbreviations**

598 ACC, adrenocortical carcinoma; AOD, average optical density; ATCC, American type culture  
599 collection; B2M, beta2-microglobulin; BLCA, bladder urothelial carcinoma; BRCA, breast invasive  
600 carcinoma; BrdU, Bromodeoxyuridine; CCK-8, cell counting kit-8; CCL2, C-C motif chemokine  
601 ligand 2; CCL22, C-C chemokine ligand 22; CCR1, C-C motif chemokine receptor 1; CCR2, C-C  
602 motif chemokine receptor 2; CCR5, C-C motif chemokine receptor 5; CCTCC, China Center for Type  
603 Culture Collection; CESC, cervical squamous cell carcinoma and endocervical adenocarcinoma;  
604 CHOL, cholangiocarcinoma; COAD, colon adenocarcinoma; CPTAC, Clinical Proteomics Tumor  
605 Analysis Consortium; CSF1R, colony stimulating factor 1 receptor; CXCL16, C-X-C motif chemokine  
606 ligand 16; DAB, diaminobenzidine; DFI, disease free interval; DLBC, lymphoid neoplasm diffuse  
607 large B-cell lymphoma; DMEM, Dulbecco's Modified Eagle Medium; DSS, disease specific survival;  
608 ESCA, esophageal carcinoma; FAP, fibroblast activation protein; FBS, fetal bovine serum; GBM,  
609 glioblastoma multiforme; GSEA, gene set enrichment analysis; GTEx, Genotype-tissue expression;  
610 HLA-A, human leukocyte antigen-A; HNSC, head and neck squamous cell carcinoma; IHC,  
611 immunohistochemistry; IL2RA, interleukin-2  $\alpha$ -chain receptor; KEGG, Kyoto Encyclopedia of Genes  
612 and Genomes; KICH, kidney chromophobe; KIRC, kidney renal clear cell carcinoma; KIRP, kidney  
613 renal papillary cell carcinoma; LAML, acute myeloid leukemia; LGALS9, galectin-9; LGG, brain  
614 lower grade glioma; LIHC, liver hepatocellular carcinoma; LUAD, lung adenocarcinoma; LUSC, lung  
615 squamous cell carcinoma; MESO, mesothelioma; MHCs, major histocompatibility complexes; MOI,  
616 multiplicity of infection; NK cells, natural killer cells; OD, optical density; OS, overall survival; OV,

617 ovarian serous cystadenocarcinoma; PAAD, pancreatic adenocarcinoma; PCPG, pheochromocytoma  
618 and paraganglioma; PFS, progression free survival; PRAD, prostate adenocarcinoma; PTC, papillary  
619 thyroid cancer; qRT-PCR, quantitative real-time polymerase chain reaction; READ, rectum  
620 adenocarcinoma; RESM, RNA-Seq by Expectation-Maximization; SARC, sarcoma; SKCM, skin  
621 cutaneous melanoma; STAD, stomach adenocarcinoma; TAPBP, tapasin binding protein; TCGA, the  
622 cancer genome atlas; TGCT, testicular germ cell tumors; THCA, thyroid carcinoma; THYM, thymoma;  
623 TME, tumor microenvironment; TNFRSF13, tumor necrosis factor TNF receptor superfamily member  
624 13; Tregs, T regulatory cells; UCEC, uterine corpus endometria carcinoma; UCS, uterine  
625 carcinosarcoma; UVM, uveal melanoma; VDR, vitamin D receptor.

626

## 627 **References**

- 628 1. Borchmann S, Cirillo M, Goergen H, Meder L, Sasse S, Kreissl S, et al. Pretreatment Vitamin D  
629 Deficiency Is Associated With Impaired Progression-Free and Overall Survival in Hodgkin  
630 Lymphoma. *J Clin Oncol.* 2019;37(36):3528-37, <https://doi.org/10.1200/JCO.19.00985>
- 631 2. Radujkovic A, Kordelas L, Krzykalla J, Beelen DW, Benner A, Lehnert N, et al. Pretransplant  
632 Vitamin D Deficiency Is Associated With Higher Relapse Rates in Patients Allografted for Myeloid  
633 Malignancies. *J Clin Oncol.* 2017;35(27):3143-52, <https://doi.org/10.1200/JCO.2017.73.0085>
- 634 3. Ritterhouse LL, Crowe SR, Niewold TB, Kamen DL, Macwana SR, Roberts VC, et al. Vitamin D  
635 deficiency is associated with an increased autoimmune response in healthy individuals and in  
636 patients with systemic lupus erythematosus. *Ann Rheum Dis.* 2011;70(9):1569-74,  
637 <https://doi.org/10.1136/ard.2010.148494>
- 638 4. Zhou A, Selvanayagam JB, Hyppönen E. Non-linear Mendelian randomization analyses support a

- 639 role for vitamin D deficiency in cardiovascular disease risk. *Eur Heart J.* 2021,  
640 <https://doi.org/10.1093/eurheartj/ehab809>
- 641 5. Carlberg C, Muñoz A. An update on vitamin D signaling and cancer. *Semin Cancer Biol.*  
642 2022;79:217-30, <https://doi.org/10.1016/j.semcancer.2020.05.018>
- 643 6. Belorusova AY, Rochel N. Structural Studies of Vitamin D Nuclear Receptor Ligand-Binding  
644 Properties. *Vitam Horm.* 2016;100, <https://doi.org/10.1016/bs.vh.2015.10.003>
- 645 7. Dougherty U, Mustafi R, Sadiq F, Almoghrabi A, Mustafi D, Kreisheh M, et al. The renin-  
646 angiotensin system mediates EGF receptor-vitamin d receptor cross-talk in colitis-associated colon  
647 cancer. *Clin Cancer Res.* 2014;20(22):5848-59, <https://doi.org/10.1158/1078-0432.CCR-14-0209>
- 648 8. Li Z, Jia Z, Gao Y, Xie D, Wei D, Cui J, et al. Activation of vitamin D receptor signaling  
649 downregulates the expression of nuclear FOXM1 protein and suppresses pancreatic cancer cell  
650 stemness. *Clin Cancer Res.* 2015;21(4):844-53, <https://doi.org/10.1158/1078-0432.CCR-14-2437>
- 651 9. Zinser GM, Suckow M, Welsh J. Vitamin D receptor (VDR) ablation alters carcinogen-induced  
652 tumorigenesis in mammary gland, epidermis and lymphoid tissues. *J Steroid Biochem Mol Biol.*  
653 2005;97(1-2):153-64,
- 654 10. Ladumor Y, Seong BKA, Hallett R, Valencia-Sama I, Adderley T, Wang Y, et al. Vitamin D  
655 Receptor Activation Attenuates Hippo Pathway Effectors and Cell Survival in Metastatic  
656 Neuroblastoma. *Mol Cancer Res.* 2022;20(6):895-908, [https://doi.org/10.1158/1541-7786.MCR-  
657 21-0425](https://doi.org/10.1158/1541-7786.MCR-21-0425)
- 658 11. Tavera-Mendoza LE, Westerling T, Libby E, Marusyk A, Cato L, Cassani R, et al. Vitamin D  
659 receptor regulates autophagy in the normal mammary gland and in luminal breast cancer cells. *Proc  
660 Natl Acad Sci U S A.* 2017;114(11):E2186-E94, <https://doi.org/10.1073/pnas.1615015114>

- 661 12. Ji M, Liu L, Hou Y, Li B.  $1\alpha,25$ -Dihydroxyvitamin D<sub>3</sub> restrains stem cell-like properties of ovarian  
662 cancer cells by enhancing vitamin D receptor and suppressing CD44. *Oncol Rep.* 2019;41(6):3393-  
663 403, <https://doi.org/10.3892/or.2019.7116>
- 664 13. Huss L, Butt ST, Borgquist S, Elebro K, Sandsveden M, Rosendahl A, et al. Vitamin D receptor  
665 expression in invasive breast tumors and breast cancer survival. *Breast Cancer Res.* 2019;21(1):84,  
666 <https://doi.org/10.1186/s13058-019-1169-1>
- 667 14. Ferrer-Mayorga G, Gómez-López G, Barbáchano A, Fernández-Barral A, Peña C, Pisano DG, et  
668 al. Vitamin D receptor expression and associated gene signature in tumour stromal fibroblasts  
669 predict clinical outcome in colorectal cancer. *Gut.* 2017;66(8):1449-62,  
670 <https://doi.org/10.1136/gutjnl-2015-310977>
- 671 15. Srinivasan M, Parwani AV, Hershberger PA, Lenzner DE, Weissfeld JL. Nuclear vitamin D  
672 receptor expression is associated with improved survival in non-small cell lung cancer. *J Steroid*  
673 *Biochem Mol Biol.* 2011;123(1-2):30-6, <https://doi.org/10.1016/j.jsbmb.2010.10.002>
- 674 16. Józwicki W, Brożyna AA, Siekiera J, Slominski AT. Expression of Vitamin D Receptor (VDR)  
675 Positively Correlates with Survival of Urothelial Bladder Cancer Patients. *Int J Mol Sci.*  
676 2015;16(10):24369-86, <https://doi.org/10.3390/ijms161024369>
- 677 17. Juhász O, Jákob N, Rajnai H, Imrei M, Garami M. Immunohistochemical Detection of the  
678 Presence of Vitamin D Receptor in Childhood Solid Tumors. *Cancers (Basel).* 2022;14(14),  
679 <https://doi.org/10.3390/cancers14143295>
- 680 18. Kim MJ, Kim D, Koo JS, Lee JH, Nam K-H. Vitamin D Receptor Expression and its Clinical  
681 Significance in Papillary Thyroid Cancer. *Technol Cancer Res Treat.* 2022;21:15330338221089933,  
682 <https://doi.org/10.1177/15330338221089933>



- 683 19. Bueno AC, Stecchini MF, Marrero-Gutiérrez J, More CB, Leal LF, Gomes DC, et al. Vitamin D  
684 receptor hypermethylation as a biomarker for pediatric adrenocortical tumors. *Eur J Endocrinol.*  
685 2022;186(5):573-85, <https://doi.org/10.1530/EJE-21-0879>
- 686 20. Al-Azhri J, Zhang Y, Bshara W, Zirpoli G, McCann SE, Khoury T, et al. Tumor Expression of  
687 Vitamin D Receptor and Breast Cancer Histopathological Characteristics and Prognosis. *Clin*  
688 *Cancer Res.* 2017;23(1), <https://doi.org/10.1158/1078-0432.CCR-16-0075>
- 689 21. Choi JY, Yi JW, Lee JH, Song R-Y, Yu H, Kwon H, et al. mRNA overexpression is associated with  
690 worse prognostic factors in papillary thyroid carcinoma. *Endocr Connect.* 2017;6(3):172-8,  
691 <https://doi.org/10.1530/EC-17-0001>
- 692 22. Sahin MO, Canda AE, Yorukoglu K, Mungan MU, Sade M, Kirkali Z. 1,25 Dihydroxyvitamin  
693 D(3) receptor expression in superficial transitional cell carcinoma of the bladder: a possible  
694 prognostic factor? *Eur Urol.* 2005;47(1):52-7,
- 695 23. Kocatürk B. In silico analysis reveals PRDX4 as a prognostic and oncogenic marker in renal  
696 papillary cell carcinoma. *Gene.* 2023;859:147201, <https://doi.org/10.1016/j.gene.2023.147201>
- 697 24. Luo L, Wang Z, Hu T, Feng Z, Zeng Q, Shu X, et al. Multiomics characteristics and  
698 immunotherapeutic potential of EZH2 in pan-cancer. *Biosci Rep.* 2023;43(1),  
699 <https://doi.org/10.1042/bsr20222230>
- 700 25. Zhang Y, Wang H, Liu Y, Yang J, Zuo X, Dong M, et al. Comprehensive analysis of DTYMK in  
701 pan-cancer and verification in lung adenocarcinoma. *Biosci Rep.* 2022;42(10),  
702 <https://doi.org/10.1042/bsr20221170>
- 703 26. Kurucu N, Şahin G, Sarı N, Ceylaner S, İlhan İE. Association of vitamin D receptor gene  
704 polymorphisms with osteosarcoma risk and prognosis. *J Bone Oncol.* 2019;14:100208,

705

<https://doi.org/10.1016/j.jbo.2018.100208>

706

27. Wang Z, Lim YK, Lim HCC, Chan YH, Ngiam N, Raman Nee Mani L, et al. The Role of Vitamin

707

D Receptor Polymorphisms in Predicting the Response to Therapy for Nonmuscle Invasive Bladder

708

Carcinoma. *J Urol.* 2018;200(4):737-42, <https://doi.org/10.1016/j.juro.2018.05.120>

709

28. Wang K, Dong M, Sheng W, Liu Q, Yu D, Dong Q, et al. Expression of vitamin D receptor as a

710

potential prognostic factor and therapeutic target in pancreatic cancer. *Histopathology.*

711

2015;67(3):386-97, <https://doi.org/10.1111/his.12663>

712

29. Li T, Fu J, Zeng Z, Cohen D, Li J, Chen Q, et al. TIMER2.0 for analysis of tumor-infiltrating

713

immune cells. *Nucleic Acids Res.* 2020;48(W1):W509-W14, <https://doi.org/10.1093/nar/gkaa407>

714

30. Robinson MD, McCarthy DJ, Smyth GK. edgeR: a Bioconductor package for differential

715

expression analysis of digital gene expression data. *Bioinformatics.* 2010;26(1):139-40,

716

<https://doi.org/10.1093/bioinformatics/btp616>

717

31. Tang Z, Kang B, Li C, Chen T, Zhang Z. GEPIA2: an enhanced web server for large-scale

718

expression profiling and interactive analysis. *Nucleic Acids Res.* 2019;47(W1):W556-W60,

719

<https://doi.org/10.1093/nar/gkz430>

720

32. Cerami E, Gao J, Dogrusoz U, Gross BE, Sumer SO, Aksoy BA, et al. The cBio cancer genomics

721

portal: an open platform for exploring multidimensional cancer genomics data. *Cancer Discov.*

722

2012;2(5):401-4, <https://doi.org/10.1158/2159-8290.CD-12-0095>

723

33. Liu C-J, Hu F-F, Xia M-X, Han L, Zhang Q, Guo A-Y. GSCALite: a web server for gene set cancer

724

analysis. *Bioinformatics.* 2018;34(21):3771-2, <https://doi.org/10.1093/bioinformatics/bty411>

725

34. Goldman MJ, Craft B, Hastie M, Repečka K, McDade F, Kamath A, et al. Visualizing and

726

interpreting cancer genomics data via the Xena platform. *Nat Biotechnol.* 2020;38(6):675-8,

- 727 <https://doi.org/10.1038/s41587-020-0546-8>
- 728 35. Ji Z, Vokes SA, Dang CV, Ji H. Turning publicly available gene expression data into discoveries  
729 using gene set context analysis. *Nucleic Acids Res.* 2016;44(1):e8,  
730 <https://doi.org/10.1093/nar/gkv873>
- 731 36. Ru B, Wong CN, Tong Y, Zhong JY, Zhong SSW, Wu WC, et al. TISIDB: an integrated repository  
732 portal for tumor-immune system interactions. *Bioinformatics.* 2019;35(20):4200-2,  
733 <https://doi.org/10.1093/bioinformatics/btz210>
- 734 37. Zeng D, Li M, Zhou R, Zhang J, Sun H, Shi M, et al. Tumor Microenvironment Characterization  
735 in Gastric Cancer Identifies Prognostic and Immunotherapeutically Relevant Gene Signatures.  
736 *Cancer Immunol Res.* 2019;7(5):737-50, <https://doi.org/10.1158/2326-6066.CIR-18-0436>
- 737 38. Yoshihara K, Shahmoradgoli M, Martínez E, Vegesna R, Kim H, Torres-Garcia W, et al. Inferring  
738 tumour purity and stromal and immune cell admixture from expression data. *Nat Commun.*  
739 2013;4:2612, <https://doi.org/10.1038/ncomms3612>
- 740 39. Vasaikar SV, Straub P, Wang J, Zhang B. LinkedOmics: analyzing multi-omics data within and  
741 across 32 cancer types. *Nucleic Acids Res.* 2018;46(D1):D956-D63,  
742 <https://doi.org/10.1093/nar/gkx1090>
- 743 40. Siegel RL, Miller KD, Fuchs HE, Jemal A. Cancer statistics, 2022. *CA Cancer J Clin.* 2022;72(1),  
744 <https://doi.org/10.3322/caac.21708>
- 745 41. Ling Y, Xu F, Xia X, Dai D, Sun R, Xie Z. Vitamin D receptor regulates proliferation and  
746 differentiation of thyroid carcinoma via the E-cadherin- $\beta$ -catenin complex. *J Mol Endocrinol.*  
747 2022;68(3):137-51, <https://doi.org/10.1530/JME-21-0167>
- 748 42. Xu F, Ling Y, Yuan J, Zeng Q, Li L, Dai D, et al. C/EBP $\beta$  mediates anti-proliferative effects of

- 749 1,25(OH)<sub>2</sub>D on differentiated thyroid carcinoma cells. *Endocr Relat Cancer*. 2022;29(6):321-34,  
750 <https://doi.org/10.1530/ERC-21-0309>
- 751 43. Garnis C, Buys TPH, Lam WL. Genetic alteration and gene expression modulation during cancer  
752 progression. *Mol Cancer*. 2004;3:9,
- 753 44. Zheng D, Long S, Xi M. Identification of TRPM2 as a Potential Therapeutic Target Associated  
754 with Immune Infiltration: A Comprehensive Pan-Cancer Analysis and Experimental Verification in  
755 Ovarian Cancer. *Int J Mol Sci*. 2023;24(15), <https://doi.org/10.3390/ijms241511912>
- 756 45. Xu L, Zhu Y, Chen L, An H, Zhang W, Wang G, et al. Prognostic value of diametrically polarized  
757 tumor-associated macrophages in renal cell carcinoma. *Ann Surg Oncol*. 2014;21(9):3142-50,  
758 <https://doi.org/10.1245/s10434-014-3601-1>
- 759 46. Henriksson ML, Edin S, Dahlin AM, Oldenborg P-A, Öberg Å, Van Guelpen B, et al. Colorectal  
760 cancer cells activate adjacent fibroblasts resulting in FGF1/FGFR3 signaling and increased invasion.  
761 *Am J Pathol*. 2011;178(3):1387-94, <https://doi.org/10.1016/j.ajpath.2010.12.008>
- 762 47. Hisano S, Sasatomi Y, Kiyoshi Y, Takebayashi S. Macrophage subclasses and proliferation in  
763 childhood IgA glomerulonephritis. *Am J Kidney Dis*. 2001;37(4):712-9,
- 764 48. Izhakov E, Somjen D, Sharon O, Knoll E, Aizic A, Fliss DM, et al. Vitamin D receptor expression  
765 is linked to potential markers of human thyroid papillary carcinoma. *J Steroid Biochem Mol Biol*.  
766 2016;159:26-30, <https://doi.org/10.1016/j.jsbmb.2016.02.016>
- 767 49. Fang Y, Song H, Huang J, Zhou J, Ding X. The clinical significance of vitamin D levels and  
768 vitamin D receptor mRNA expression in colorectal neoplasms. *J Clin Lab Anal*.  
769 2021;35(11):e23988, <https://doi.org/10.1002/jcla.23988>
- 770 50. Blomberg Jensen M, Andersen CB, Nielsen JE, Bagi P, Jorgensen A, Juul A, et al. Expression of

- 771 the vitamin D receptor, 25-hydroxylases, 1 $\alpha$ -hydroxylase and 24-hydroxylase in the human  
772 kidney and renal clear cell cancer. *J Steroid Biochem Mol Biol.* 2010;121(1-2):376-82,  
773 <https://doi.org/10.1016/j.jsbmb.2010.03.069>
- 774 51. Anderson MG, Nakane M, Ruan X, Kroeger PE, Wu-Wong JR. Expression of VDR and CYP24A1  
775 mRNA in human tumors. *Cancer Chemother Pharmacol.* 2006;57(2):234-40,  
776 <https://doi.org/10.1007/s00280-005-0059-7>
- 777 52. Trowbridge R, Sharma P, Hunter WJ, Agrawal DK. Vitamin D receptor expression and  
778 neoadjuvant therapy in esophageal adenocarcinoma. *Exp Mol Pathol.* 2012;93(1):147-53,  
779 <https://doi.org/10.1016/j.yexmp.2012.04.018>
- 780 53. Clinckspoor I, Hauben E, Verlinden L, Van den Bruel A, Vanwalleghem L, Vander Poorten V, et  
781 al. Altered expression of key players in vitamin D metabolism and signaling in malignant and  
782 benign thyroid tumors. *J Histochem Cytochem.* 2012;60(7):502-11,  
783 <https://doi.org/10.1369/0022155412447296>
- 784 54. Chiang K-C, Yeh T-S, Huang C-C, Chang Y-C, Juang H-H, Cheng C-T, et al. MART-10 represses  
785 cholangiocarcinoma cell growth and high vitamin D receptor expression indicates better prognosis  
786 for cholangiocarcinoma. *Sci Rep.* 2017;7:43773, <https://doi.org/10.1038/srep43773>
- 787 55. Salomón DG, Fermento ME, Gandini NA, Ferronato MJ, Arévalo J, Blasco J, et al. Vitamin D  
788 receptor expression is associated with improved overall survival in human glioblastoma multiforme.  
789 *J Neurooncol.* 2014;118(1):49-60, <https://doi.org/10.1007/s11060-014-1416-3>
- 790 56. Chan R-H, Chen P-C, Yeh Y-M, Lin B-W, Yang K-D, Shen M-R, et al. The Expression  
791 Quantitative Trait Loci in Immune Response Genes Impact the Characteristics and Survival of  
792 Colorectal Cancer. *Diagnostics (Basel).* 2022;12(2), <https://doi.org/10.3390/diagnostics12020315>

- 793 57. Chen R, Yang W, Li Y, Cheng X, Nie Y, Liu D, et al. Effect of immunotherapy on the immune  
794 microenvironment in advanced recurrent cervical cancer. *Int Immunopharmacol.* 2022;106:108630,  
795 <https://doi.org/10.1016/j.intimp.2022.108630>
- 796 58. Fridman WH, Galon J, Dieu-Nosjean M-C, Cremer I, Fisson S, Damotte D, et al. Immune  
797 infiltration in human cancer: prognostic significance and disease control. *Curr Top Microbiol*  
798 *Immunol.* 2011;344, [https://doi.org/10.1007/82\\_2010\\_46](https://doi.org/10.1007/82_2010_46)
- 799 59. Galon J, Fridman W-H, Pagès F. The adaptive immunologic microenvironment in colorectal  
800 cancer: a novel perspective. *Cancer Res.* 2007;67(5):1883-6,
- 801 60. Kazanietz MG, Durando M, Cooke M. CXCL13 and Its Receptor CXCR5 in Cancer:  
802 Inflammation, Immune Response, and Beyond. *Front Endocrinol (Lausanne).* 2019;10:471,  
803 <https://doi.org/10.3389/fendo.2019.00471>
- 804 61. Simon T, Salhia B. Cancer-Associated Fibroblast Subpopulations With Diverse and Dynamic  
805 Roles in the Tumor Microenvironment. *Mol Cancer Res.* 2022;20(2):183-92,  
806 <https://doi.org/10.1158/1541-7786.MCR-21-0282>
- 807 62. Alkasalias T, Flaberg E, Kashuba V, Alexeyenko A, Pavlova T, Savchenko A, et al. Inhibition of  
808 tumor cell proliferation and motility by fibroblasts is both contact and soluble factor dependent.  
809 *Proc Natl Acad Sci U S A.* 2014;111(48):17188-93, <https://doi.org/10.1073/pnas.1419554111>
- 810 63. Cantorna MT, Arora J. Two lineages of immune cells that differentially express the vitamin D  
811 receptor. *J Steroid Biochem Mol Biol.* 2023;228:106253,  
812 <https://doi.org/10.1016/j.jsbmb.2023.106253>
- 813 64. Szczerba BM, Castro-Giner F, Vetter M, Krol I, Gkoutela S, Landin J, et al. Neutrophils escort  
814 circulating tumour cells to enable cell cycle progression. *Nature.* 2019;566(7745):553-7,

815

<https://doi.org/10.1038/s41586-019-0915-y>

816

65. Governa V, Trella E, Mele V, Tornillo L, Amicarella F, Cremonesi E, et al. The Interplay Between

817

Neutrophils and CD8 T Cells Improves Survival in Human Colorectal Cancer. *Clin Cancer Res.*

818

2017;23(14):3847-58, <https://doi.org/10.1158/1078-0432.CCR-16-2047>

819

66. Zeng Z, Li J, Zhang J, Li Y, Liu X, Chen J, et al. Immune and stromal scoring system associated

820

with tumor microenvironment and prognosis: a gene-based multi-cancer analysis. *J Transl Med.*

821

2021;19(1):330, <https://doi.org/10.1186/s12967-021-03002-1>

822

67. Huang Y, Chen L, Tang Z, Min Y, Yu W, Yang G, et al. A Novel Immune and Stroma Related

823

Prognostic Marker for Invasive Breast Cancer in Tumor Microenvironment: A TCGA Based Study.

824

*Front Endocrinol (Lausanne).* 2021;12:774244, <https://doi.org/10.3389/fendo.2021.774244>

825

68. Ma S-Y, Tian X-P, Cai J, Su N, Fang Y, Zhang Y-C, et al. A prognostic immune risk score for

826

diffuse large B-cell lymphoma. *Br J Haematol.* 2021;194(1):111-9,

827

<https://doi.org/10.1111/bjh.17478>

828

69. Xu F, Guan Y, Xue L, Zhang P, Li M, Gao M, et al. The roles of ferroptosis regulatory gene

829

SLC7A11 in renal cell carcinoma: A multi-omics study. *Cancer Med.* 2021;10(24):9078-96,

830

<https://doi.org/10.1002/cam4.4395>

831

70. Li T, Fan J, Wang B, Traugh N, Chen Q, Liu JS, et al. TIMER: A Web Server for Comprehensive

832

Analysis of Tumor-Infiltrating Immune Cells. *Cancer Res.* 2017;77(21):e108-e10,

833

<https://doi.org/10.1158/0008-5472.CAN-17-0307>

834

71. Chen J, Lv B, Zhan Y, Zhu K, Zhang R, Chen B, et al. Comprehensive Exploration of Tumor

835

Microenvironment Modulation Based on the ESTIMATE Algorithm in Bladder Urothelial

836

Carcinoma Microenvironment. *Front Oncol.* 2022;12:724261,

- 837 <https://doi.org/10.3389/fonc.2022.724261>
- 838 72. Ke Z-B, Wu Y-P, Huang P, Hou J, Chen Y-H, Dong R-N, et al. Identification of novel genes in  
839 testicular cancer microenvironment based on ESTIMATE algorithm-derived immune scores. *J Cell*  
840 *Physiol.* 2021;236(1):706-13, <https://doi.org/10.1002/jcp.29898>
- 841 73. Luo Q, Vögeli T-A. A Methylation-Based Reclassification of Bladder Cancer Based on Immune  
842 Cell Genes. *Cancers (Basel)*. 2020;12(10), <https://doi.org/10.3390/cancers12103054>
- 843 74. Yue Y, Zhang Q, Sun Z. CX3CR1 Acts as a Protective Biomarker in the Tumor Microenvironment  
844 of Colorectal Cancer. *Front Immunol.* 2021;12:758040,  
845 <https://doi.org/10.3389/fimmu.2021.758040>
- 846 75. Hu B, Wei Q, Zhou C, Ju M, Wang L, Chen L, et al. Analysis of immune subtypes based on  
847 immunogenomic profiling identifies prognostic signature for cutaneous melanoma. *Int*  
848 *Immunopharmacol.* 2020;89(Pt A):107162, <https://doi.org/10.1016/j.intimp.2020.107162>
- 849 76. Singh PK, van den Berg PR, Long MD, Vreugdenhil A, Grieshober L, Ochs-Balcom HM, et al.  
850 Integration of VDR genome wide binding and GWAS genetic variation data reveals co-occurrence  
851 of VDR and NF- $\kappa$ B binding that is linked to immune phenotypes. *BMC Genomics.* 2017;18(1):132,  
852 <https://doi.org/10.1186/s12864-017-3481-4>
- 853 77. Silvagno F, Poma CB, Realmuto C, Ravarino N, Ramella A, Santoro N, et al. Analysis of vitamin  
854 D receptor expression and clinical correlations in patients with ovarian cancer. *Gynecol Oncol.*  
855 2010;119(1):121-4, <https://doi.org/10.1016/j.ygyno.2010.06.008>
- 856 78. Haussler MR, Jurutka PW, Mizwicki M, Norman AW. Vitamin D receptor (VDR)-mediated  
857 actions of  $1\alpha,25(\text{OH})_2$  vitamin D<sub>3</sub>: genomic and non-genomic mechanisms. *Best Pract Res Clin*  
858 *Endocrinol Metab.* 2011;25(4):543-59, <https://doi.org/10.1016/j.beem.2011.05.010>



- 859 79. Zhang Z-H, Liu M-D, Yao K, Xu S, Yu D-X, Xie D-D, et al. Vitamin D deficiency aggravates  
860 growth and metastasis of prostate cancer through promoting EMT in two  $\beta$ -catenin-related  
861 mechanisms. *J Nutr Biochem*. 2023;111:109177, <https://doi.org/10.1016/j.jnutbio.2022.109177>
- 862 80. Zhao X, Yu D, Yang J, Xue K, Liu Y, Jin C. Knockdown of Snail inhibits epithelial-mesenchymal  
863 transition of human laryngeal squamous cell carcinoma Hep-2 cells through the vitamin D receptor  
864 signaling pathway. *Biochem Cell Biol*. 2017;95(6):672-8, <https://doi.org/10.1139/bcb-2017-0039>
- 865 81. Bi X, Shi Q, Zhang H, Bao Y, Hu D, Pohl N, et al. c-Jun NH2-terminal kinase 1 interacts with  
866 vitamin D receptor and affects vitamin D-mediated inhibition of cancer cell proliferation. *J Steroid  
867 Biochem Mol Biol*. 2016;163:164-72, <https://doi.org/10.1016/j.jsbmb.2016.05.009>

868

869

870

871

872

873

874

875

876

877 **Table 1 The abbreviations and full names of 33 types of human cancers and changes of VDR**

878 **expression in these cancers**

| <b>Abbreviations</b> | <b>Full names</b>                                                | <b>Changes of expression</b> |
|----------------------|------------------------------------------------------------------|------------------------------|
| ACC                  | Adrenocortical carcinoma                                         | →                            |
| BLCA                 | Bladder urothelial carcinoma                                     | →                            |
| BRCA                 | Breast invasive carcinoma                                        | ↑                            |
| CESC                 | Cervical squamous cell carcinoma and endocervical adenocarcinoma | ↑                            |
| CHOL                 | Cholangiocarcinoma                                               | ↑                            |
| COAD                 | Colon adenocarcinoma                                             | ↓                            |
| DLBC                 | Lymphoid neoplasm diffuse large B-cell lymphoma                  | →                            |
| ESCA                 | Esophageal carcinoma                                             | ↑                            |
| GBM                  | Glioblastoma multiforme                                          | →                            |
| HNSC                 | Head and neck squamous cell carcinoma                            | ↑                            |
| KICH                 | Kidney chromophobe                                               | ↑                            |
| KIRC                 | Kidney renal clear cell carcinoma                                | ↓                            |
| KIRP                 | Kidney renal papillary cell carcinoma                            | ↓                            |
| LAML                 | Acute myeloid leukemia                                           | →                            |
| LGG                  | Brain lower grade glioma                                         | →                            |
| LIHC                 | Liver hepatocellular carcinoma                                   | ↑                            |
| LUAD                 | Lung adenocarcinoma                                              | ↑                            |
| LUSC                 | Lung squamous cell carcinoma                                     | →                            |
| MESO                 | Mesothelioma                                                     |                              |
| OV                   | Ovarian serous cystadenocarcinoma                                | ↑                            |
| PAAD                 | Pancreatic adenocarcinoma                                        | →                            |
| PCPG                 | Pheochromocytoma and paraganglioma                               | ↓                            |
| PRAD                 | Prostate adenocarcinoma                                          | ↓                            |
| READ                 | Rectum adenocarcinoma                                            | ↓                            |
| SARC                 | Sarcoma                                                          | →                            |
| SKCM                 | Skin cutaneous melanoma                                          | ↓                            |
| STAD                 | Stomach adenocarcinoma                                           | ↑                            |
| TGCT                 | Testicular germ cell tumors                                      | →                            |
| THCA                 | Thyroid carcinoma                                                | ↑                            |
| THYM                 | Thymoma                                                          | ↓                            |
| UCEC                 | Uterine corpus endometrial carcinoma                             | ↑                            |
| UCS                  | Uterine carcinosarcoma                                           | →                            |
| UVM                  | Uveal melanoma                                                   |                              |

879 The up, down, and horizontal arrows indicate increased, decreased, and comparable expression levels when compared

880 with matched normal tissues.

881

882

883

884 **Figure 1. VDR expression was decreased in 8 types and increased in 12 types of cancer when**  
885 **compared with adjacent normal tissues**

886 **(A)** The differential expression of VDR between tumors and adjacent normal tissues was provided  
887 through the TIMER2.0 platform. \*  $p < 0.05$ ; \*\*  $p < 0.01$ ; \*\*\*  $p < 0.001$ . **(B)** For some types of cancers,  
888 normal data were matched via TCGA and GTEx databases by the GEPIA 2 platform. \*  $p < 0.05$ . **(C)**  
889 The expression levels of VDR in human cancers were showed by the cBioPortal tool. The tumor  
890 category was sorted according to the median of VDR expression levels. **(D)** The relationships between  
891 VDR expression and pathologic stages of HNSC, KICH, TGCT, or THCA were analyzed based on the  
892 GSCA platform. \*  $p < 0.05$ .

893  
894 **Figure 2. Increased expression of VDR was associated with either good prognosis in CHOL,**  
895 **KIRC, ESCA, and OV or poor prognosis in LGG, GBM, LAML, UVM, PAAD, ACC, and THCA**  
896 The forest plots were used to show the results of univariate COX regression analysis of OS, PFS, DSS,  
897 and DFI via R software. Hazard ratio less than 1 indicated the protective role of VDR expression for  
898 death.  $P$  value less than 0.05 was considered statistically significant.

899  
900 **Figure 3. VDR genetic alterations and negative association with survival in ACC, LUAD and OV**  
901 Alteration related data were obtained through the cBioPortal platform based on TCGA database. **(A)**  
902 The frequency of alterations involving missense, truncating, splice and SV/fusion of VDR in various  
903 human tumors, **(B)** the mutation site in the 3D structure and **(C)** schematic diagram of protein were  
904 displayed. **(D)** The negative relationships between the genetic alterations of VDR and OS, DSS or PFS  
905 in ACC, LUAD and OV were showed.  $P$  value less than 0.05 was considered statistically significant.

906

907 **Figure 4 Positive correlations between VDR expression and immune infiltration of cancer-**  
908 **associated fibroblasts, macrophages or neutrophils in 20, 12 and 10 types of human tumors**  
909 **respectively**

910 The correlations between VDR expression and immune infiltration levels covering NK cells, CD4+ T  
911 cells, CD8+ T cells, Tregs, B cells, cancer associated fibroblasts, macrophages, neutrophils, myeloid  
912 cells, or monocytes were showed by heatmaps based on the TIMER2.0 platform. The red color  
913 indicates positive correlations while the blue color indicates negative correlations. *P* value less than  
914 0.05 was considered statistically significant.

915

916 **Figure 5 Positive associations between VDR expression and various immune-related genes in**  
917 **human tumors especially in TGCT and GBM**

918 We used the TISIDB online tool to explore the correlations between VDR expression and (A)  
919 immunostimulator, (B) immunoinhibitor, (C) MHCs, (D) chemokine, or (E) chemokine receptor. The  
920 red color indicates positive correlations while the blue color indicates negative correlations. The top 3  
921 highest values of Spearman's correlation were shown in scatter plots.

922

923 **Figure 6 VDR expression was positively correlated with increased proportion of stromal or**  
924 **immune components in tumor microenvironment in 24 types of human cancers**

925 (A) The correlation between VDR expression and TME related pathway scores was shown. \*  $p < 0.05$ ;

926 \*\*  $p < 0.01$ ; \*\*\*  $p < 0.001$ ; \*\*\*\*  $p < 0.0001$ . The correlations between VDR expression and

927 StromalScore, ImmuneScore, ESTIMATEScore, or TumorPurity of tumor tissues were visualized by

928 **(B)** heatmap and **(C)** lollipop-diagrams.

929

930 **Figure 7 VDR positively and negatively correlated genes were enriched in immune cell function**  
931 **and energy metabolism pathways respectively in 6 types of highly lethal tumors**

932 VDR related KEGG pathway for 6 types of highly lethal tumors ranked by estimated deaths were  
933 analyzed by the LinkedOmics database and were shown as follows: **(A)** LUAD, **(B)** PRAD, **(C)** BRCA,  
934 **(D)** COAD, **(E)** PAAD, and **(F)** LIHC. The blue color indicates positive related categories ( $FDR \leq$   
935  $0.05$ ), the orange color indicates negative related categories ( $FDR \leq 0.05$ ) while the yellow color  
936 represents no related categories. Horizontal axis indicates normalized enrichment score.

937

938 **Figure 8 Experimental validation of VDR expression and the correlation with immune**  
939 **infiltration in PTC**

940 **(A)** VDR mRNA expression was higher in classical, tall and follicular thyroid papillary carcinoma  
941 than normal tissues classified by tumor histology based on the UALCAN database. **(B)** The higher  
942 expression of VDR in PTC cell lines (K1, BCPAP) when compared with normal thyroid cell line (Nthy-  
943 ori-3-1) was confirmed by western blot analysis. **(C)** Immunohistochemical staining of VDR in the  
944 PTC tissues and adjacent non-tumor tissues ( $n = 10$ ), magnification  $\times 400$ ; Scale bar:  $50 \mu\text{m}$ . The brown  
945 color indicated by red arrow represents positive staining. **(D)** Quantification of VDR expression by  
946 ImageJ software. **(E)** The average mRNA relative expression of VDR in PTC tissues and adjacent non-  
947 tumor tissues examined by qRT-PCR ( $n = 27$ ). **(F)** The representative protein expression of VDR in  
948 PTC tissues and adjacent non-tumor tissues examined by Western blot ( $n = 27$ ). The others were  
949 presented in Supplementary Figure S6 and S7; N: adjacent non-tumor tissue; T: PTC tissue. **(G-I)**

950 Correlation analysis between the expression of VDR and FAP (cancer-associated fibroblast marker),  
951 CD68 (macrophage marker) and CD15 (neutrophil marker) in PTC tissues based on the Cq values  
952 measured by qRT-PCR. \*  $p < 0.05$ ; \*\*\*  $p < 0.001$ ; \*\*\*\*  $p < 0.0001$ .

953

#### 954 **Figure 9 Knockdown of VDR promoted proliferation and migration of PTC cells**

955 **(A)** The mRNA knockdown efficiency of VDR by lentivirus in K1 and BCPAP cells was examined  
956 through qRT-PCR. **(B)** Green fluorescence indicated virus-infected K1 and BCPAP cells (> 95%). **(C,**  
957 **D)** CCK-8 assay and **(E, F)** colony formation assay showed that cell proliferation was increased in the  
958 VDR-shRNA group than Control-shRNA group. **(G, H)** Transwell assay showed that the number of  
959 migration cells were higher in the VDR-shRNA group compared with Control-shRNA group. Each  
960 experiment was repeated three times. \*  $p < 0.05$ ; \*\*  $p < 0.01$ ; \*\*\*  $p < 0.001$ ; \*\*\*\*  $p < 0.0001$ .

961

#### 962 **Figure 10 Overexpression of VDR inhibited proliferation and migration of PTC cell lines**

963 **(A)** The overexpression efficiency of VDR by adenovirus in K1 and BCPAP cells were determined by  
964 qRT-PCR at the transcriptional level. **(B)** The transfection efficiency of VDR was more than 90%  
965 (Green fluorescence). **(C, D)** CCK-8 assay and **(E, F)** colony formation assay demonstrated that cell  
966 proliferation was suppressed in the VDR-adv group of K1 and BCPAP cells. **(G, H)** Transwell assay  
967 exhibited fewer migration cells in the VDR-adv group. Each experiment was repeated three times. \*  $p$   
968 < 0.05; \*\*  $p < 0.01$ ; \*\*\*  $p < 0.001$ ; \*\*\*\*  $p < 0.0001$ .

**(A)**

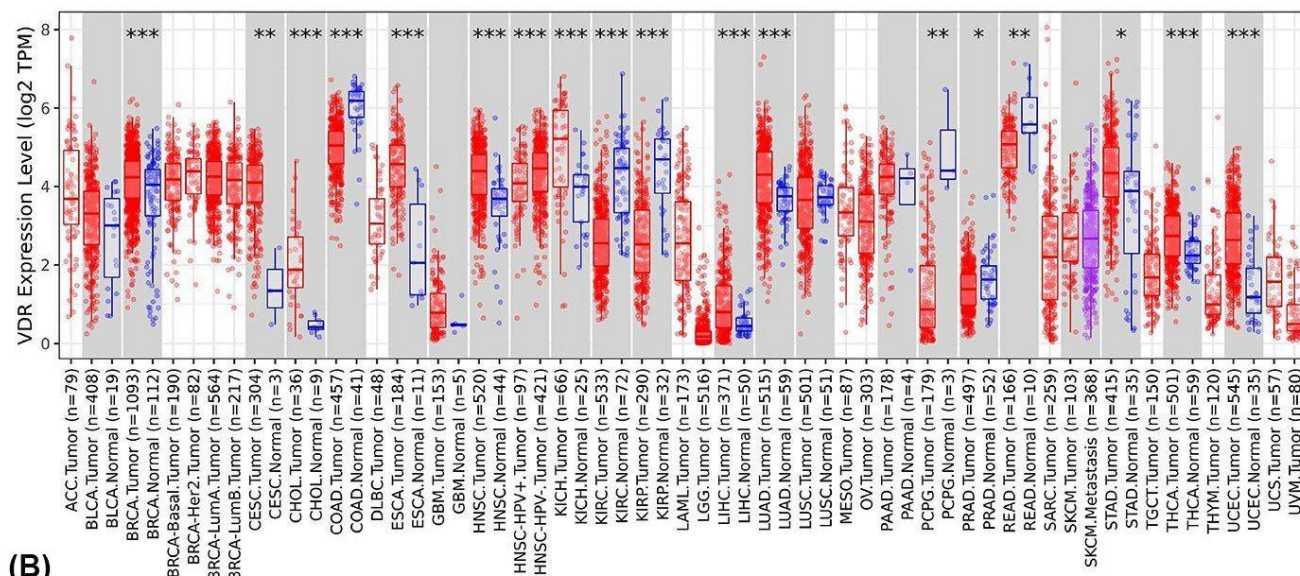

**(B)**

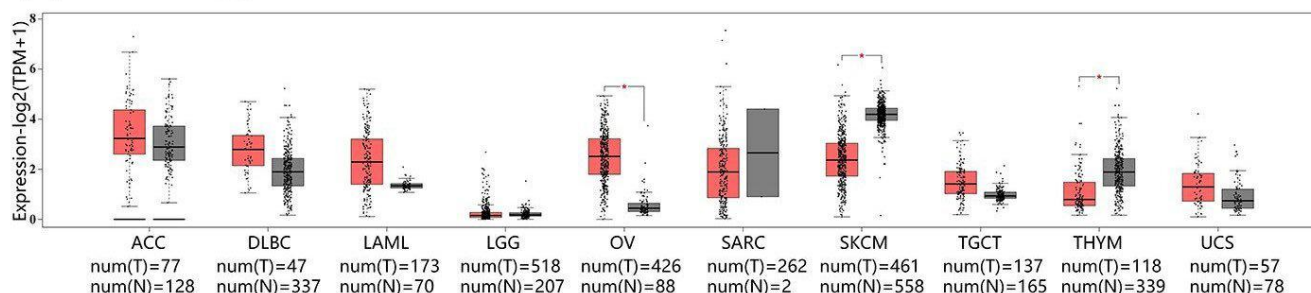

**(C)**

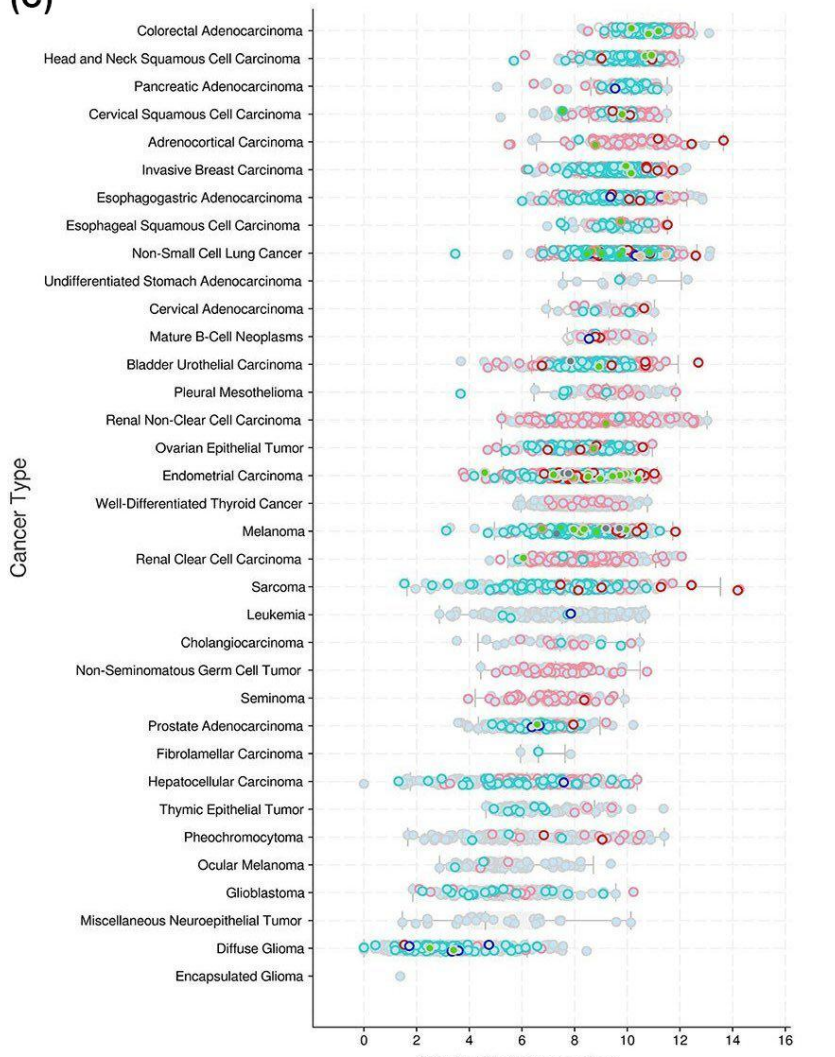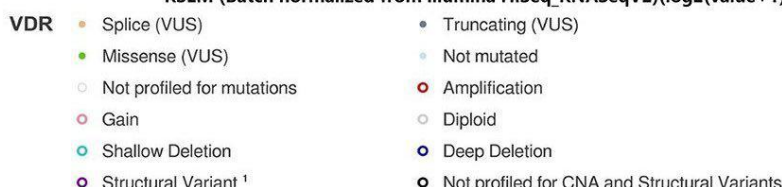

**(D)**

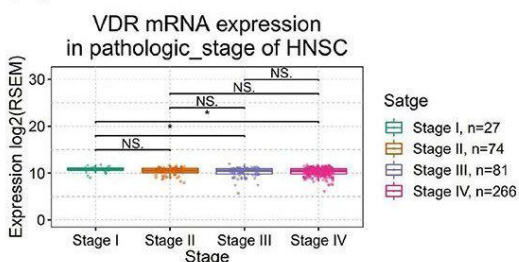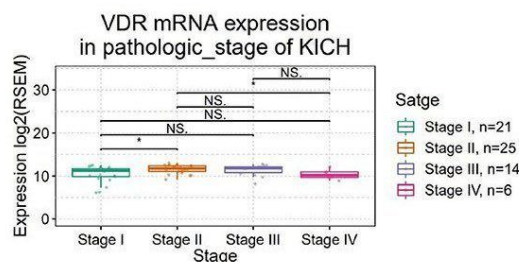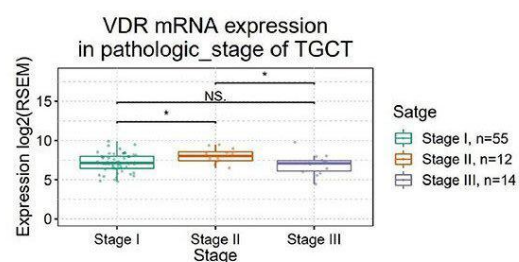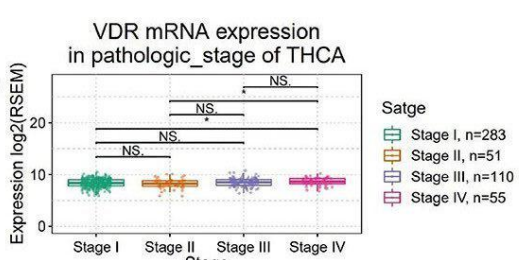

## OS

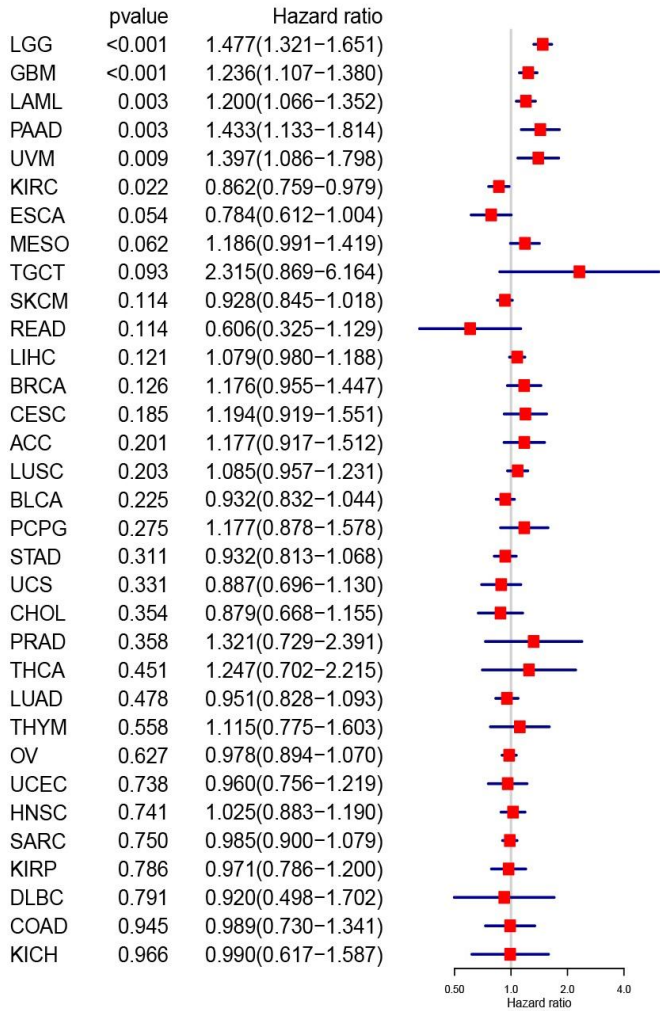

## PFS

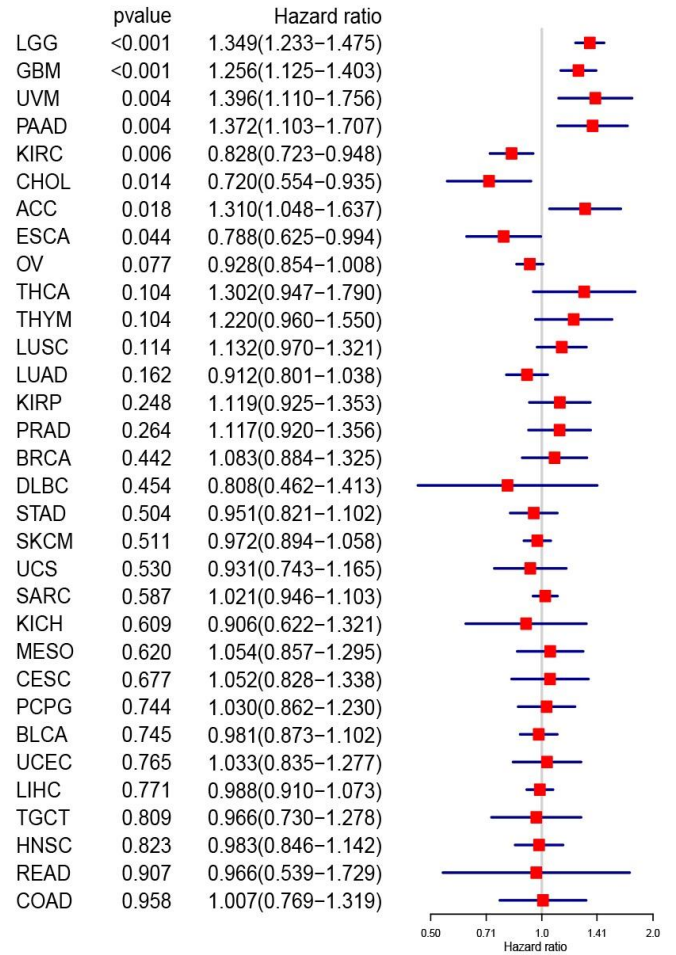

## DSS

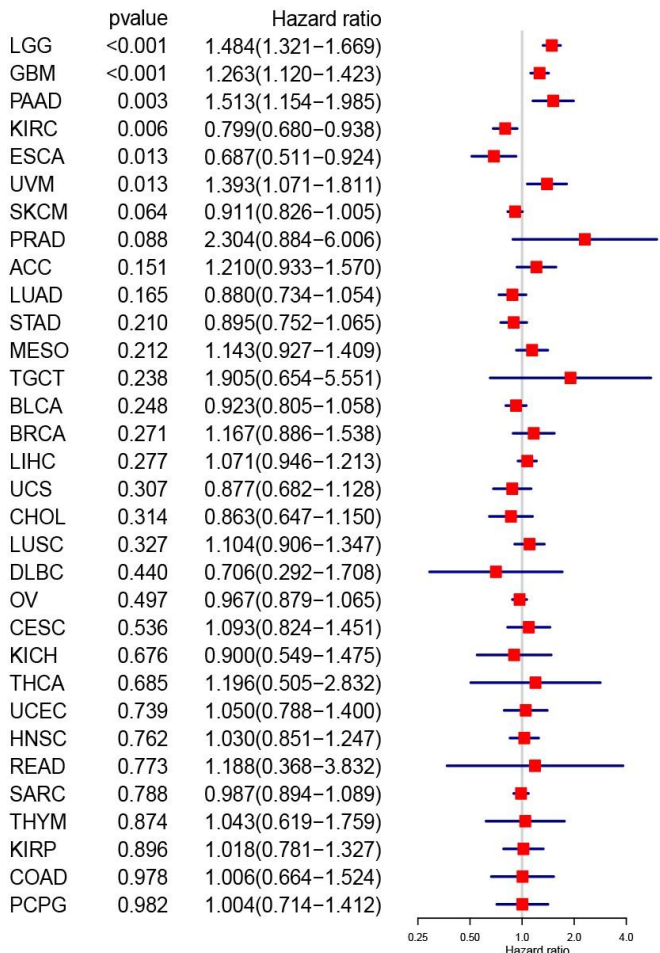

## DFI

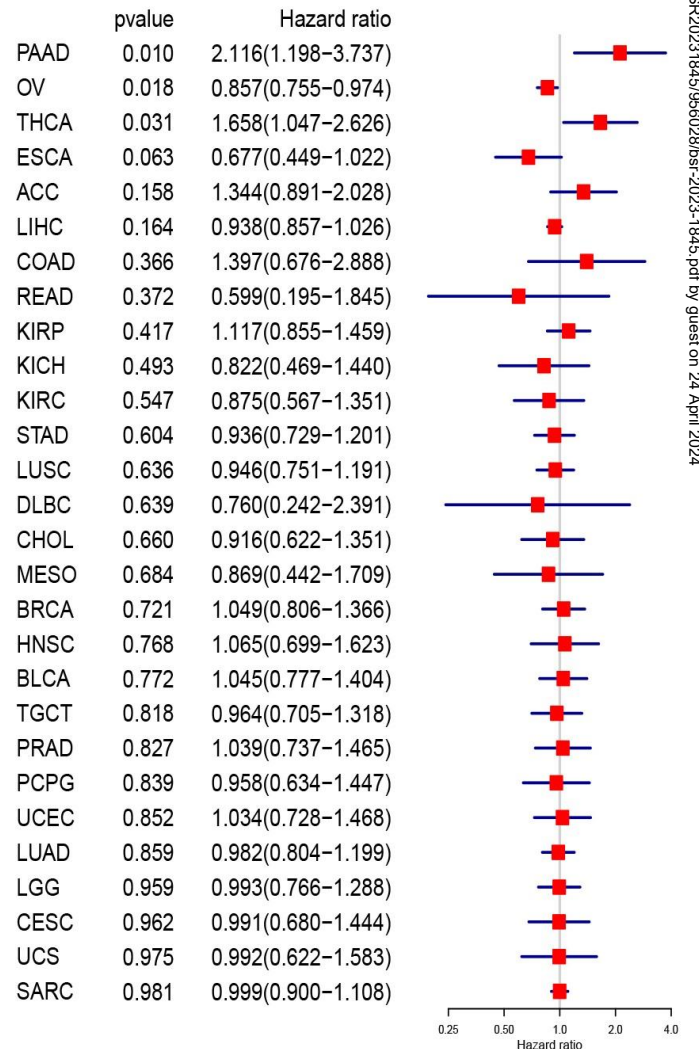



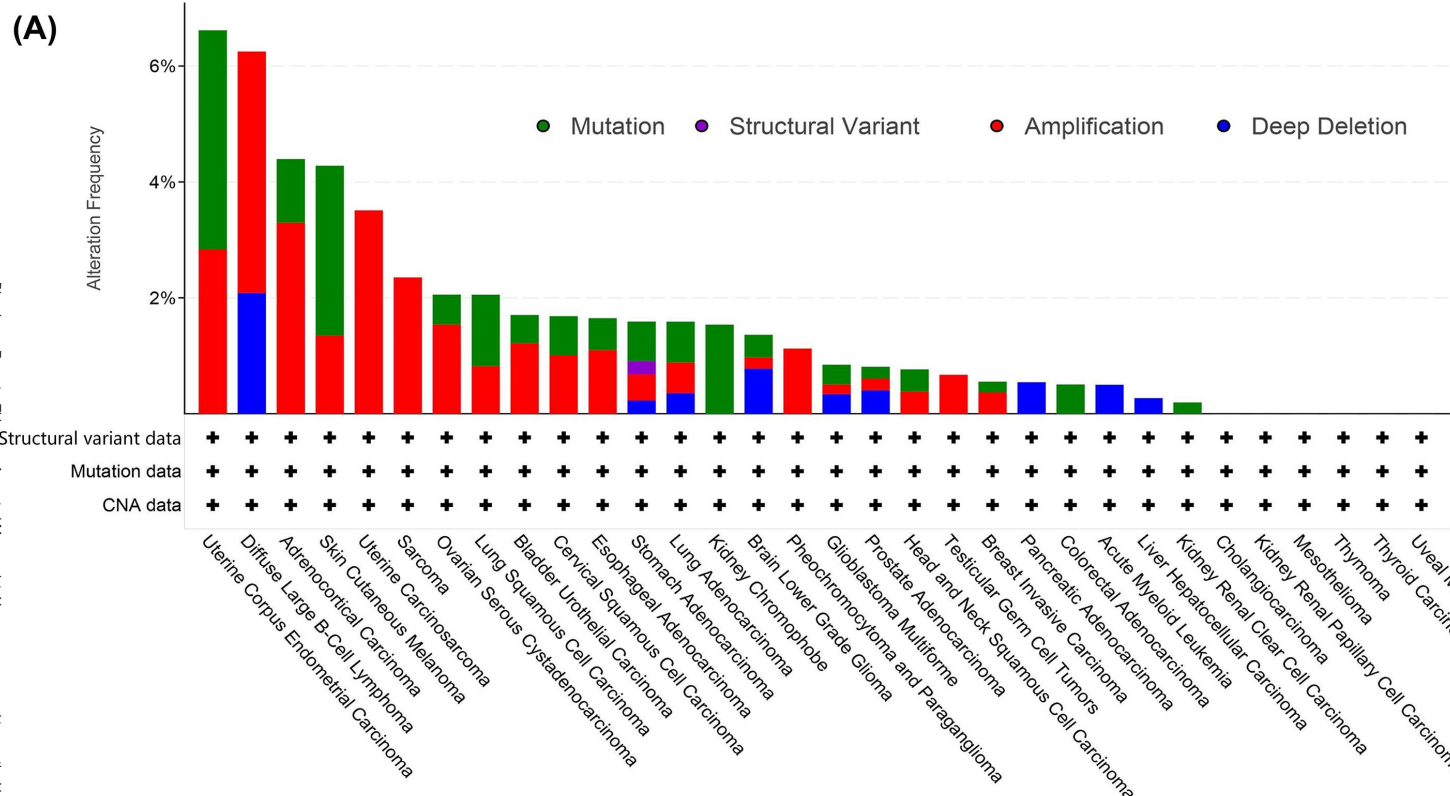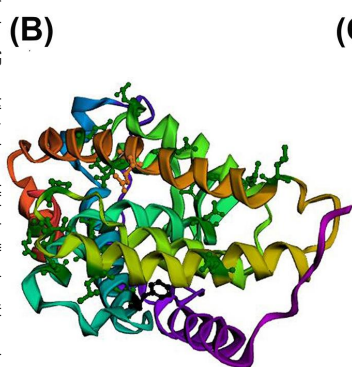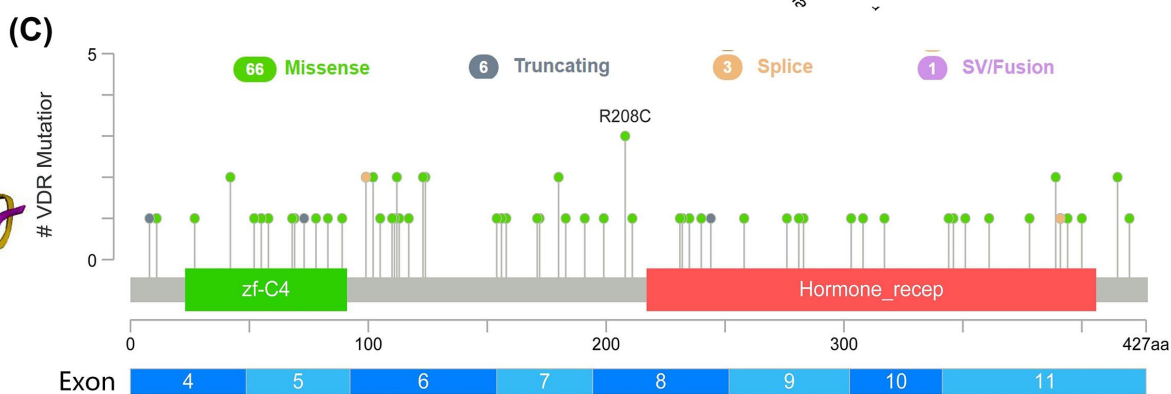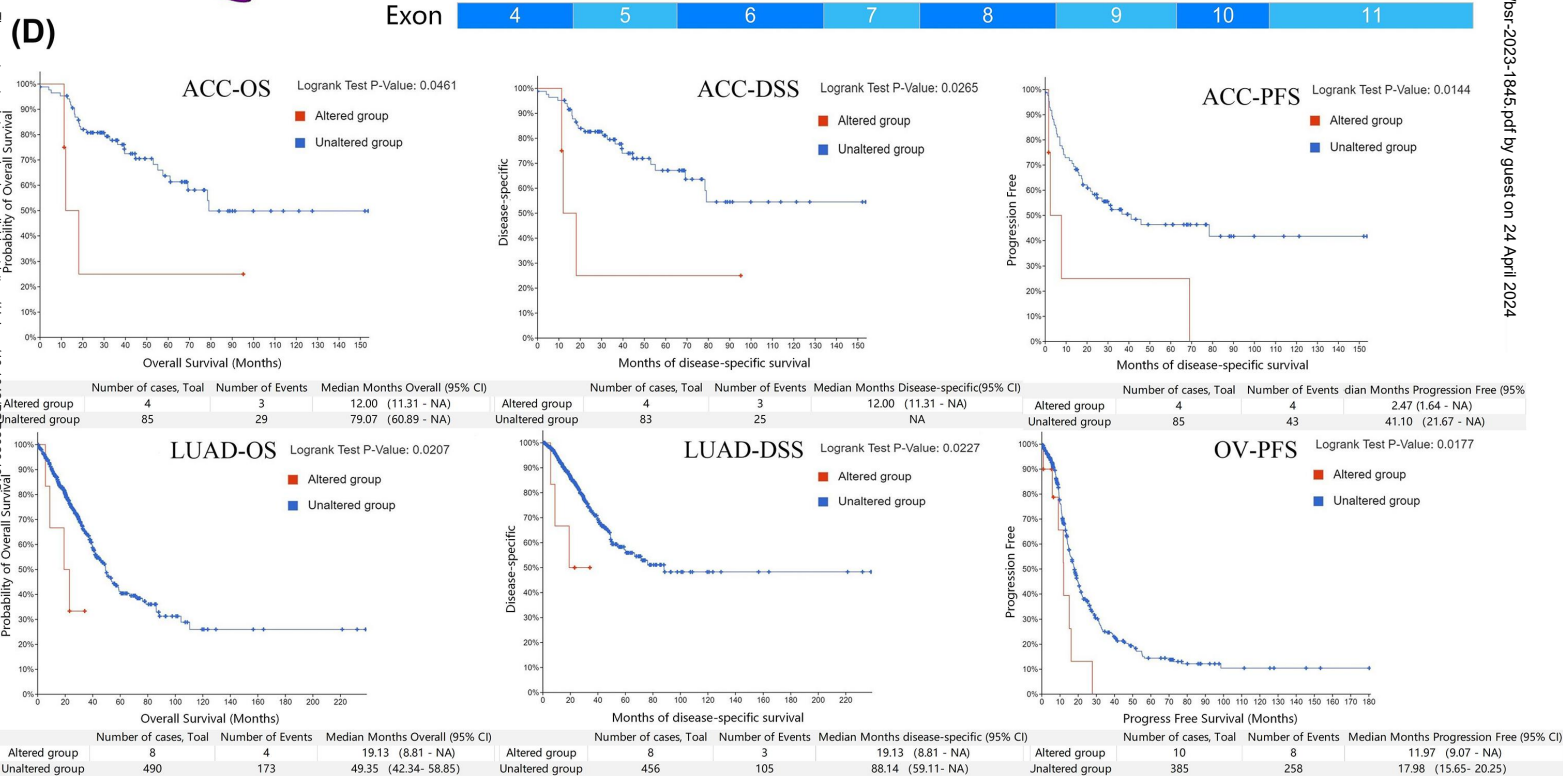

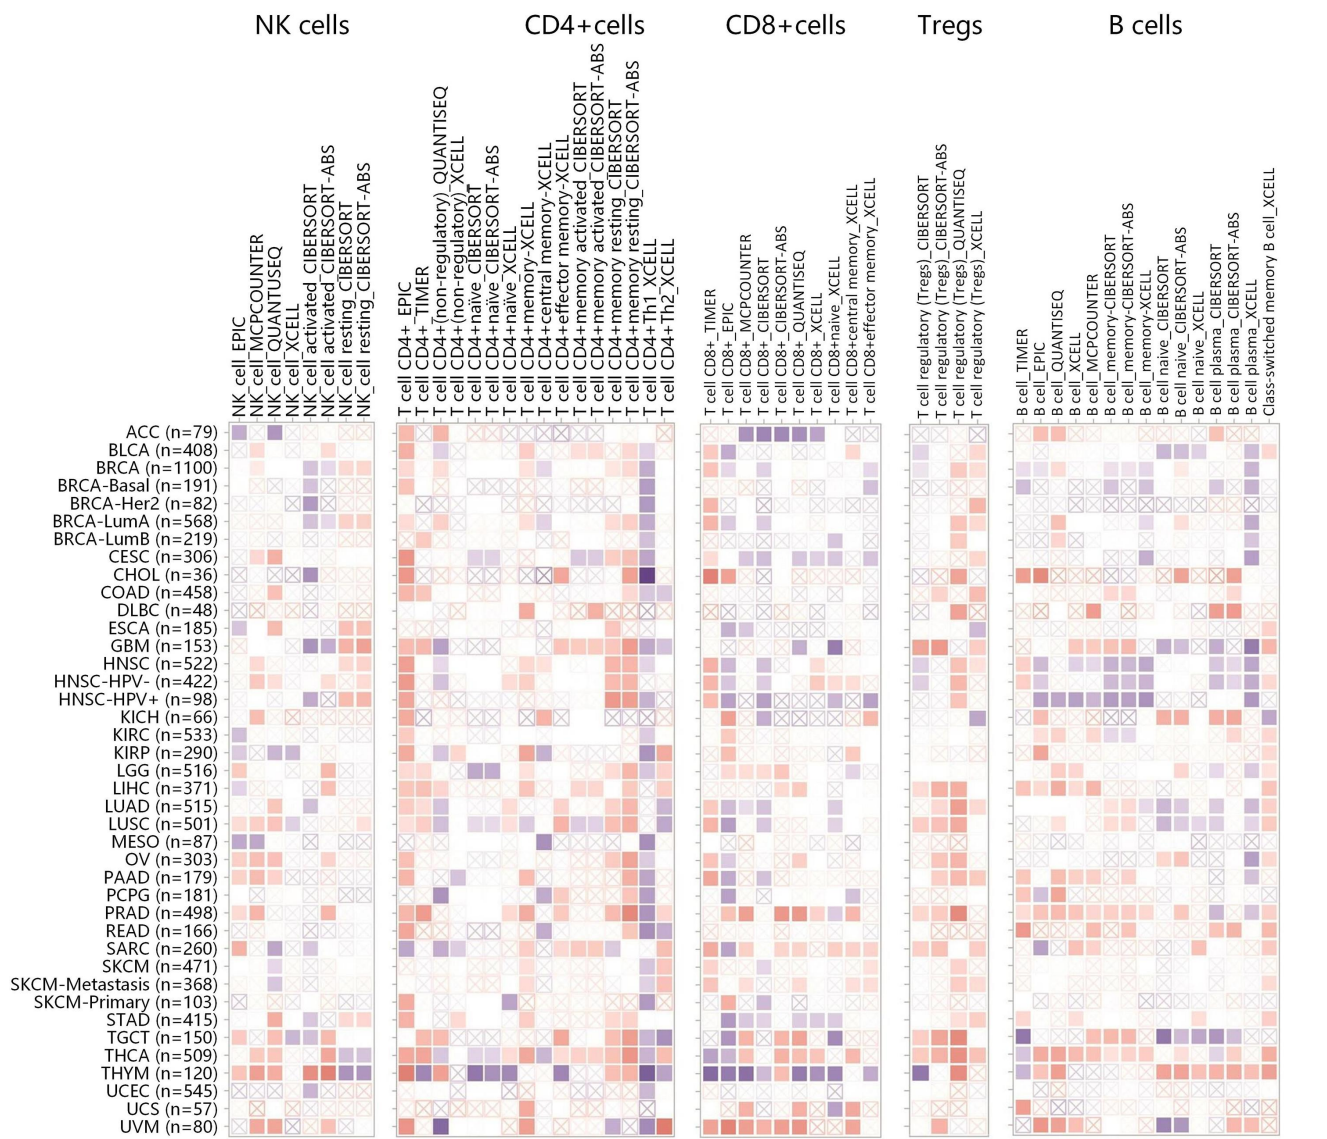

Cancer associated fibroblasts

Macrophages

Neutrophils Myeloid dendritic cells

Monocytes

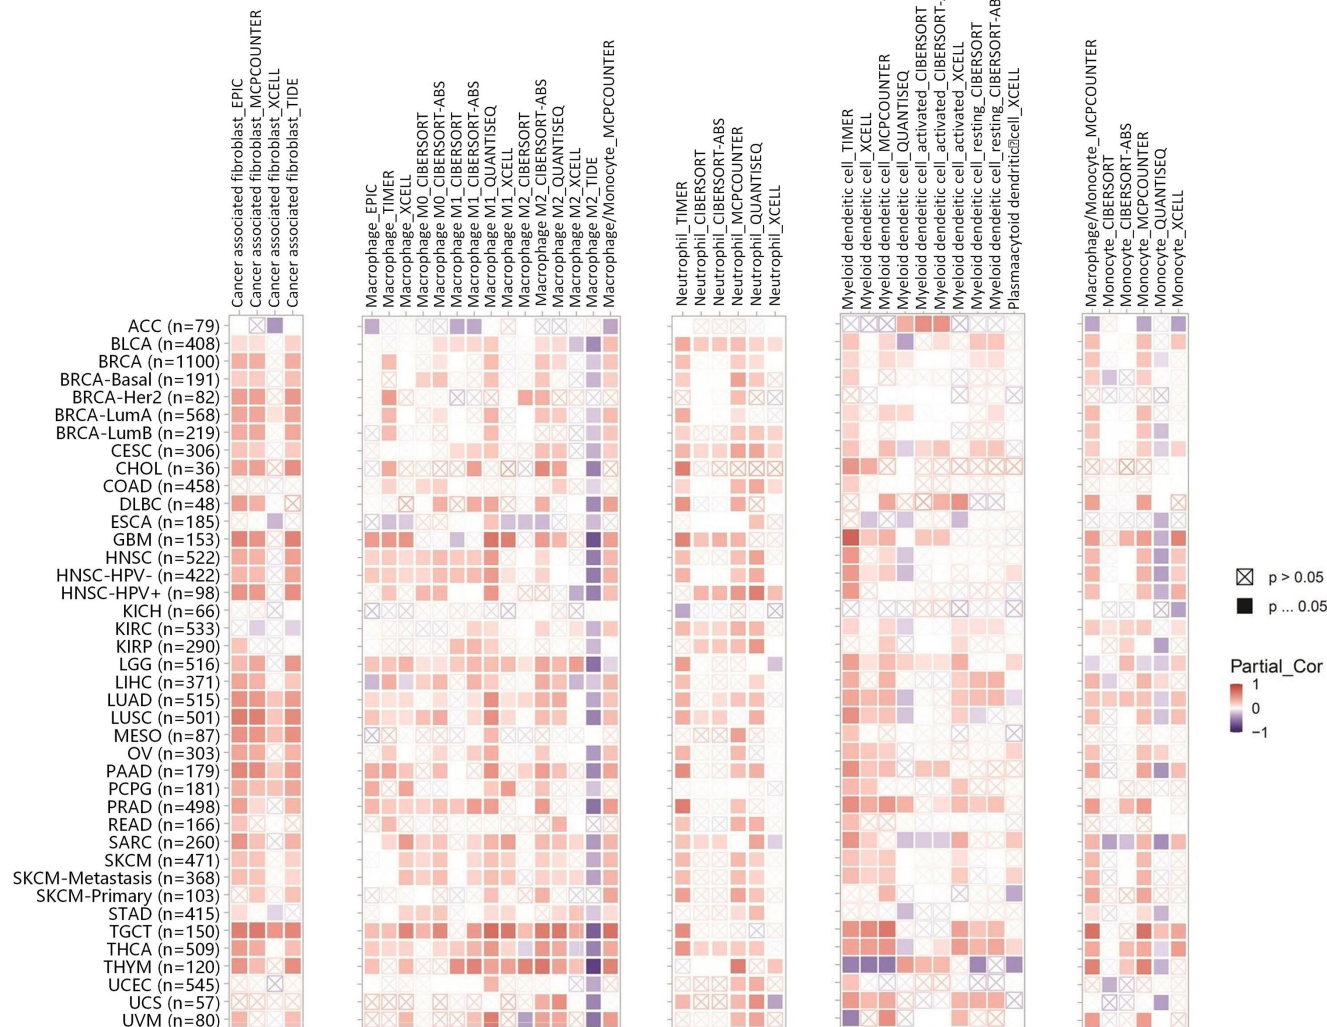

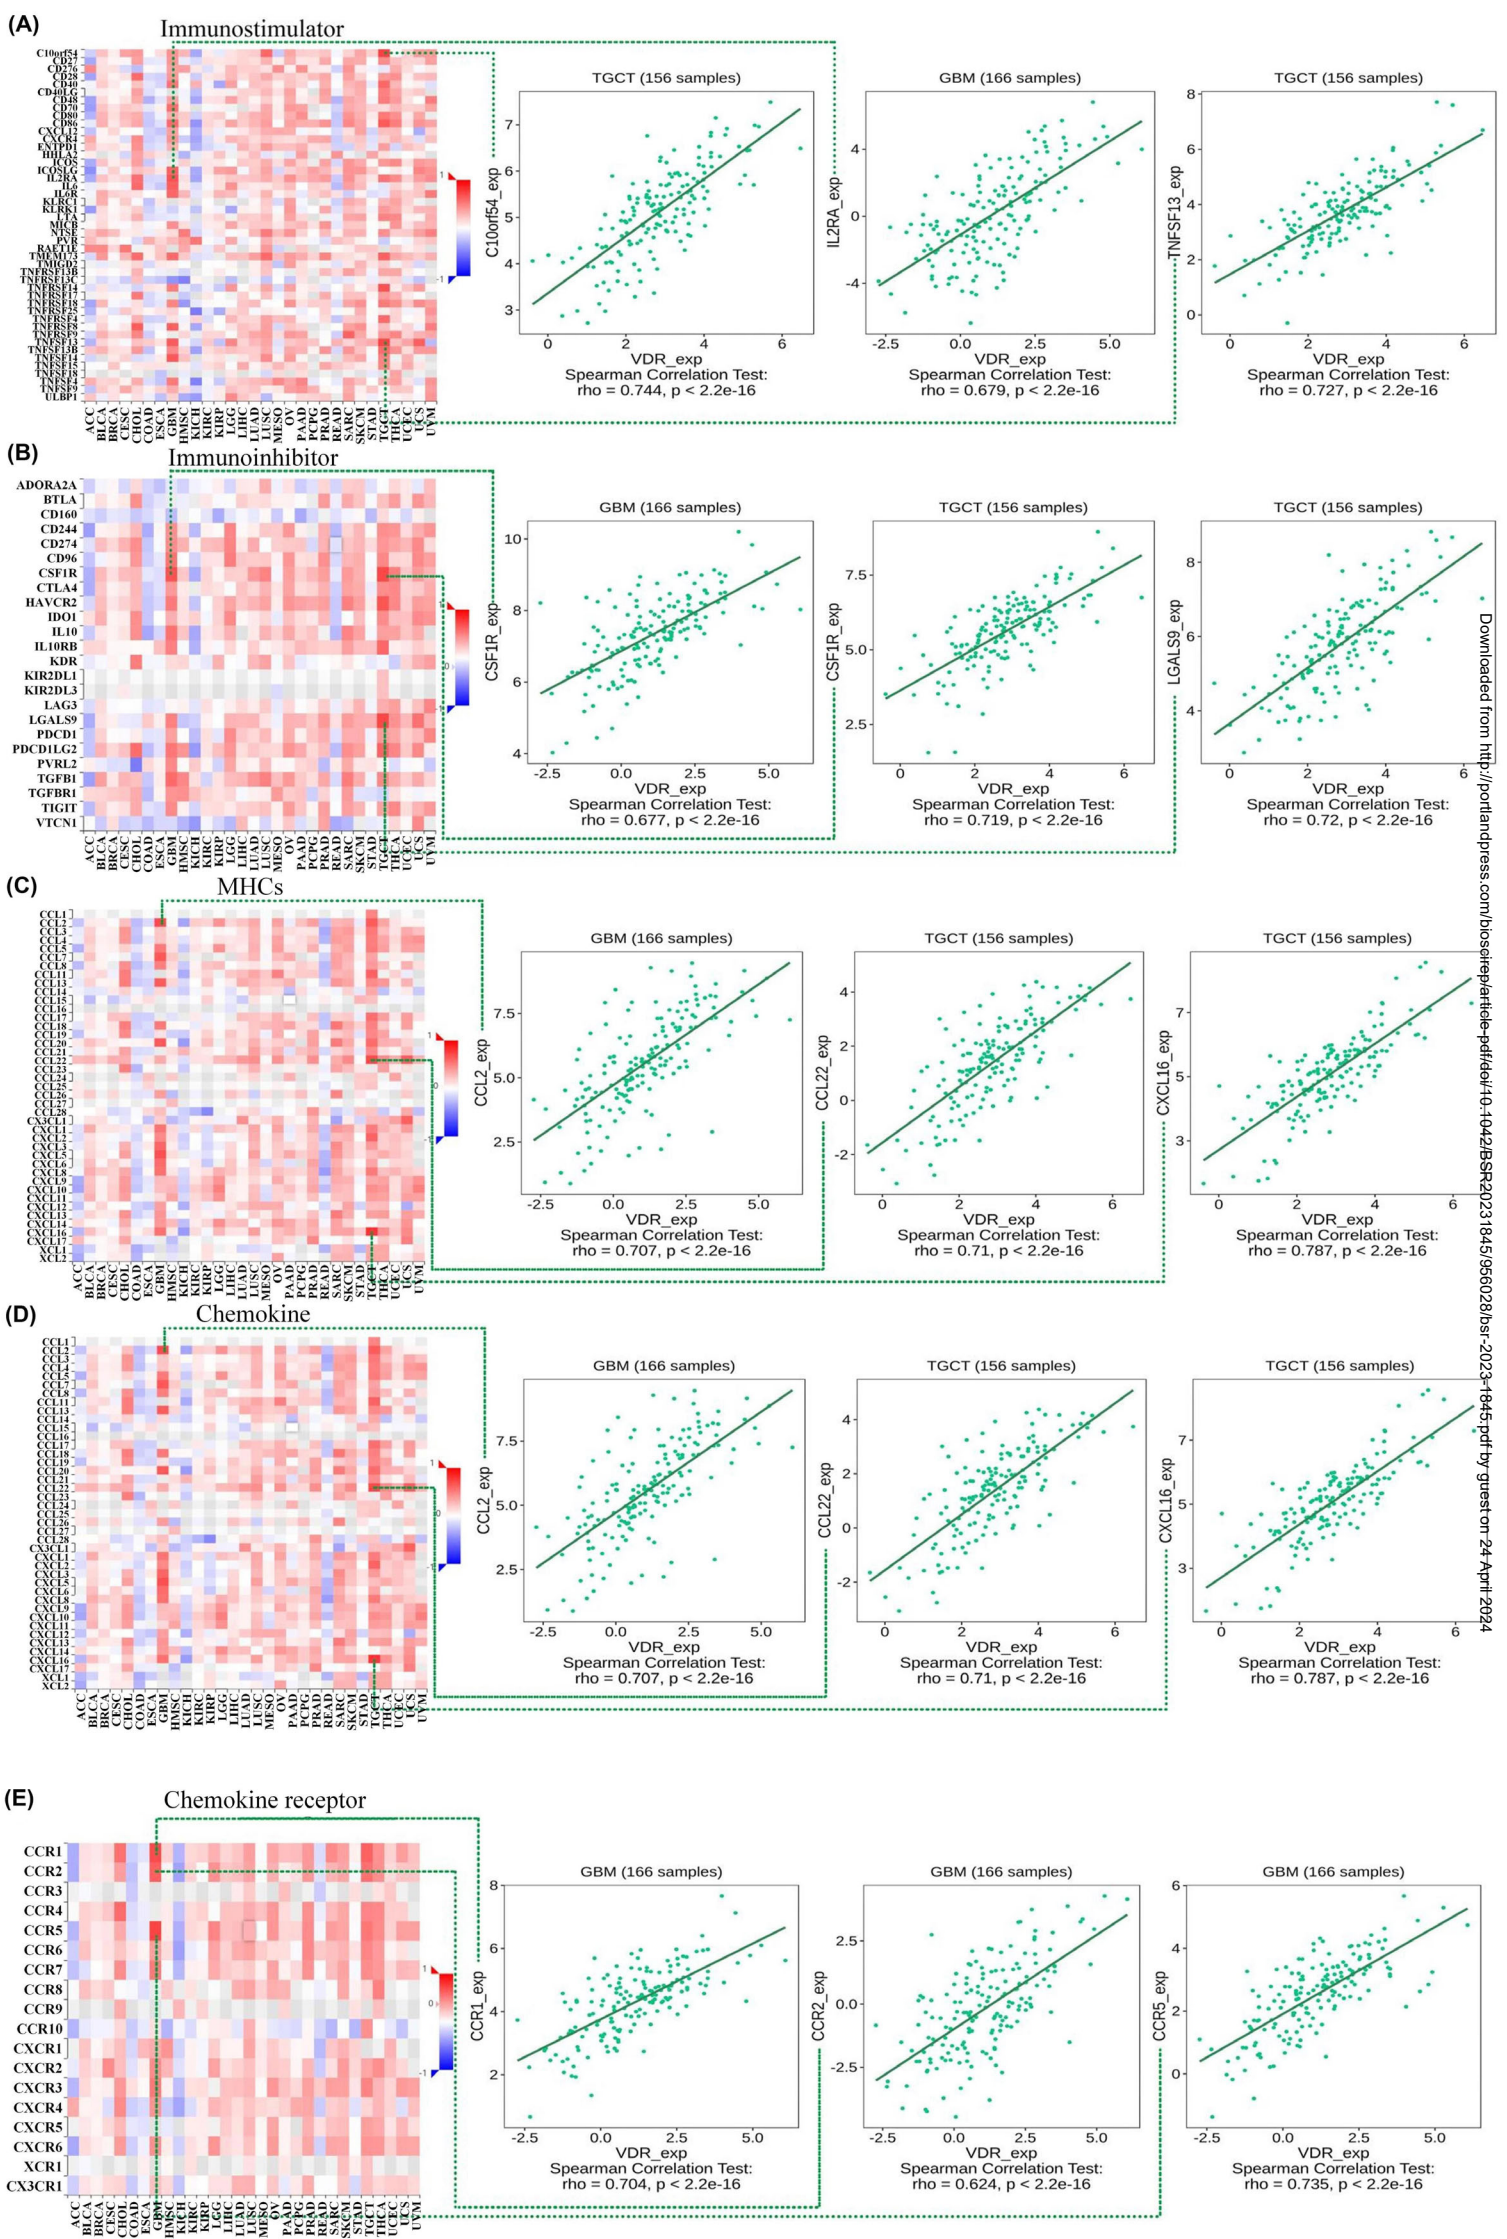

(A)

Antigen\_processing\_machinery  
 EMT2  
 EMT3  
 Pan\_F\_TBRs  
 Immune\_Checkpoint  
 CD\_8\_T\_effector  
 Nucleotide\_excision\_repair  
 DNA\_damage\_response  
 Mismatch\_Repair  
 DNA\_replication  
 Base\_excision\_repair  
 EMT1

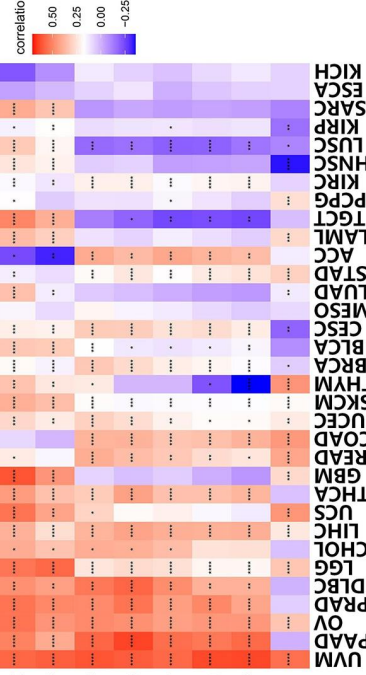

(B)

StromalScore  
 ESTIMATEScore  
 ImmuneScore  
 TumorPurity

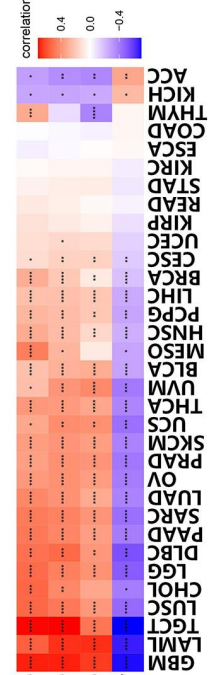

(C)

ESTIMATEScore

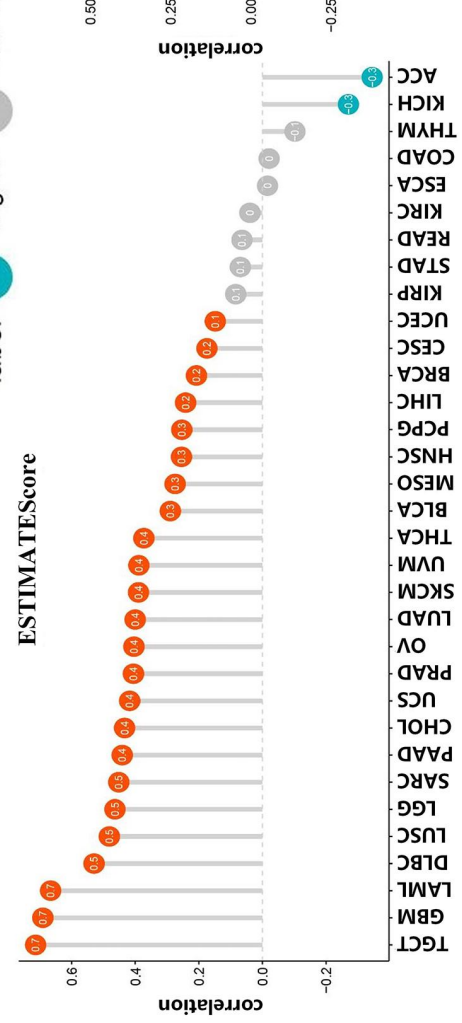

ImmuneScore

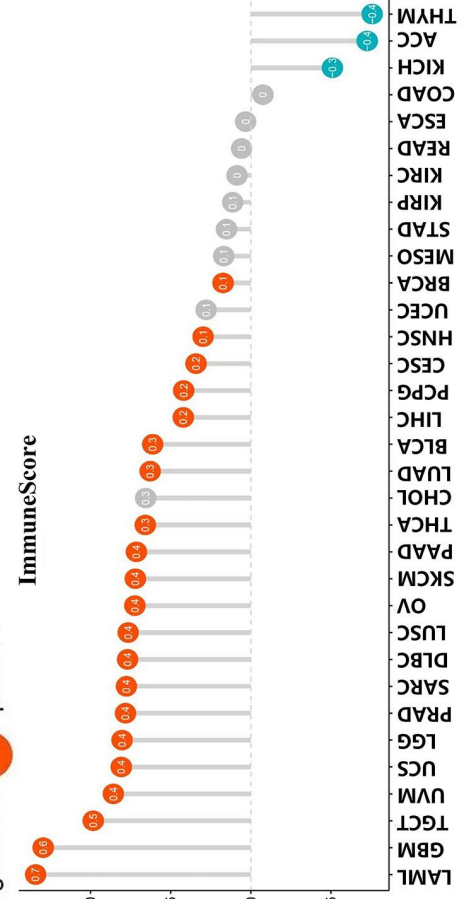

StromalScore

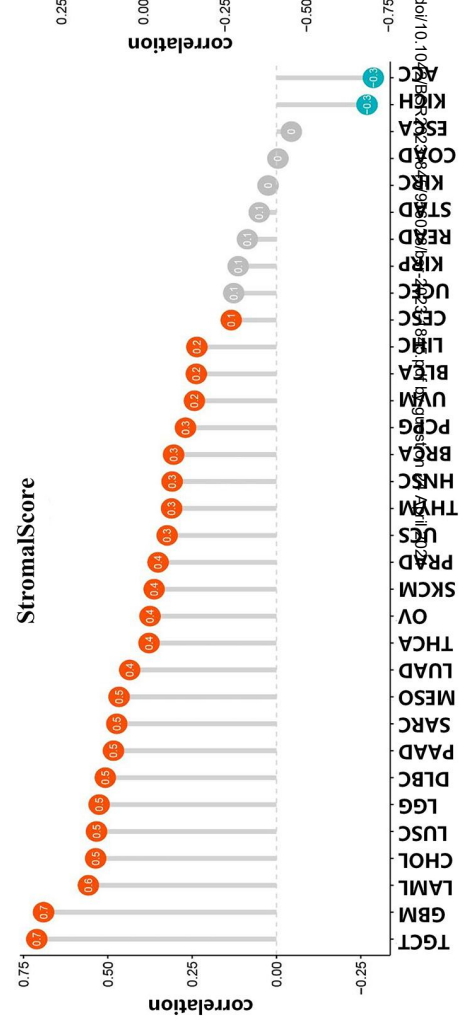

TumorPurity

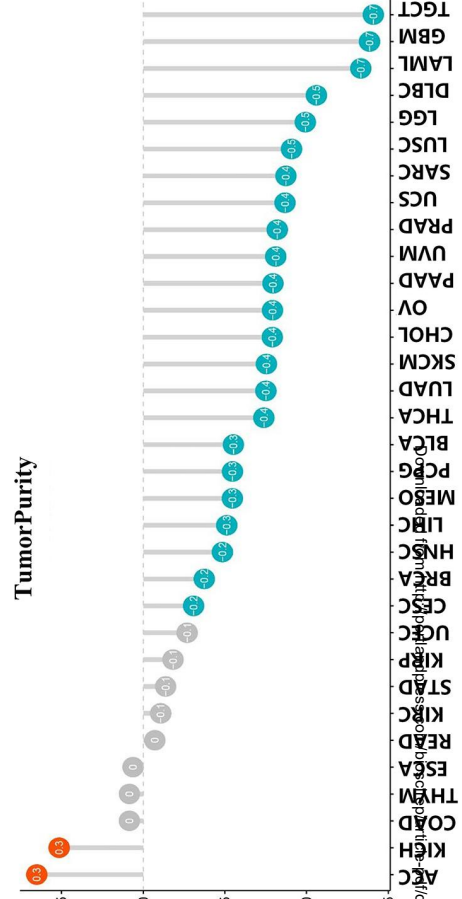

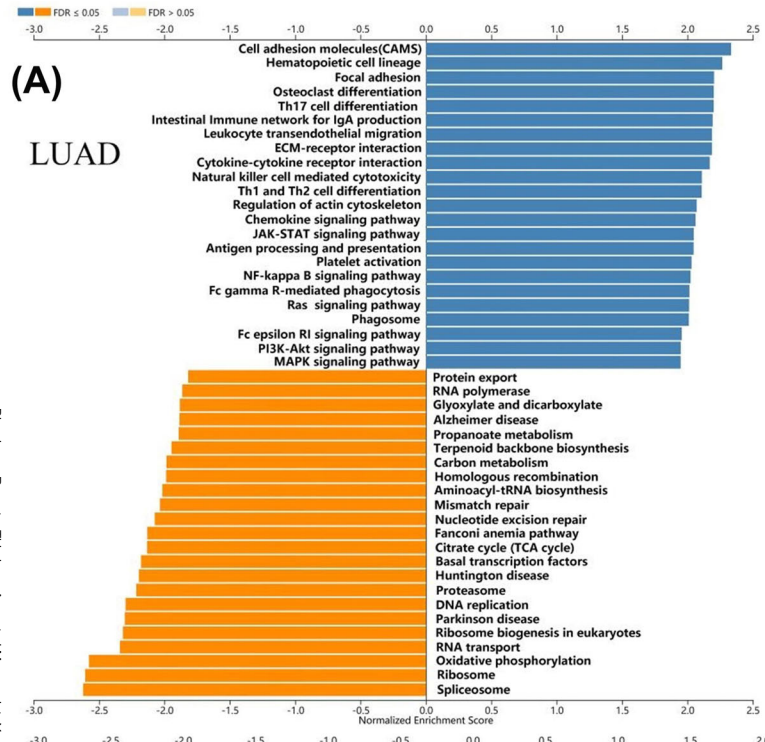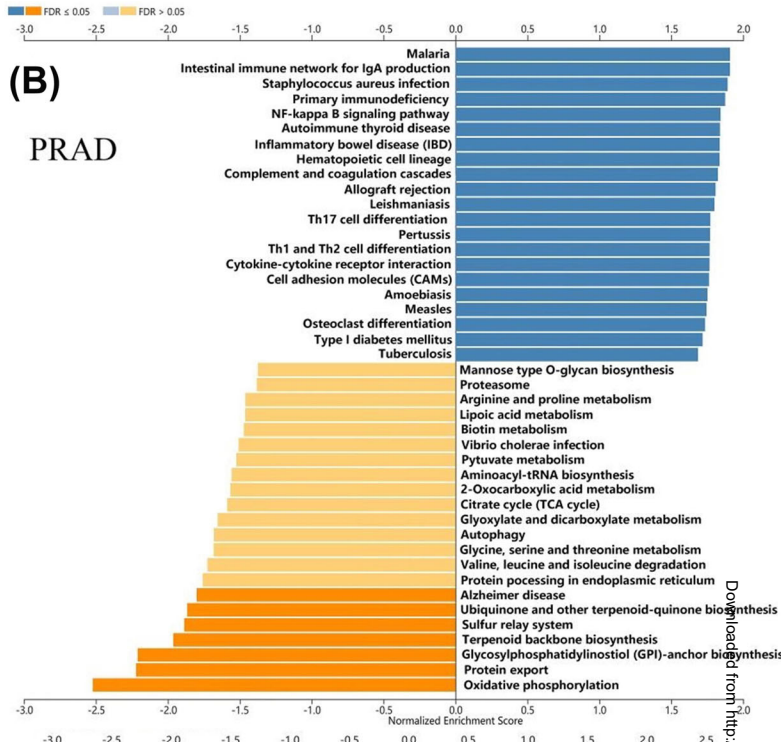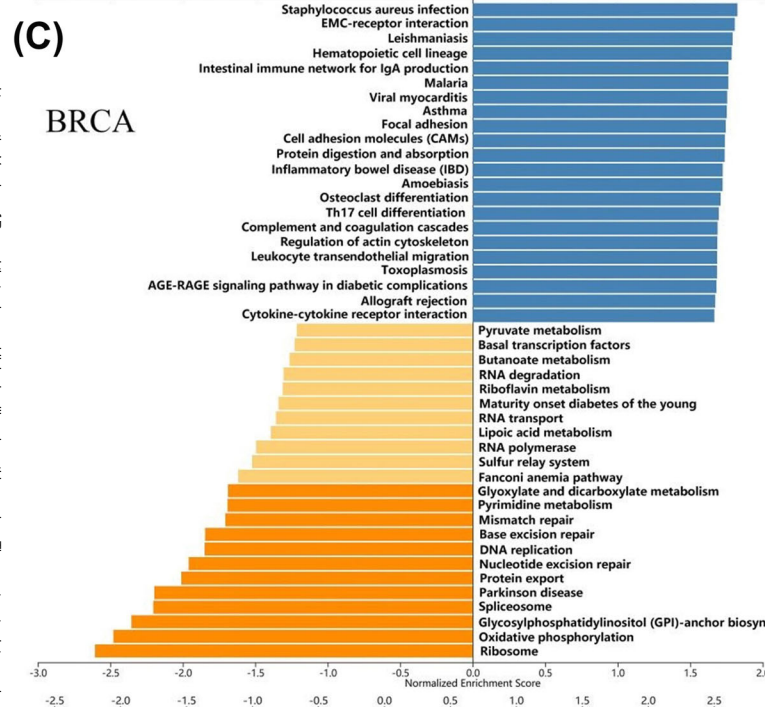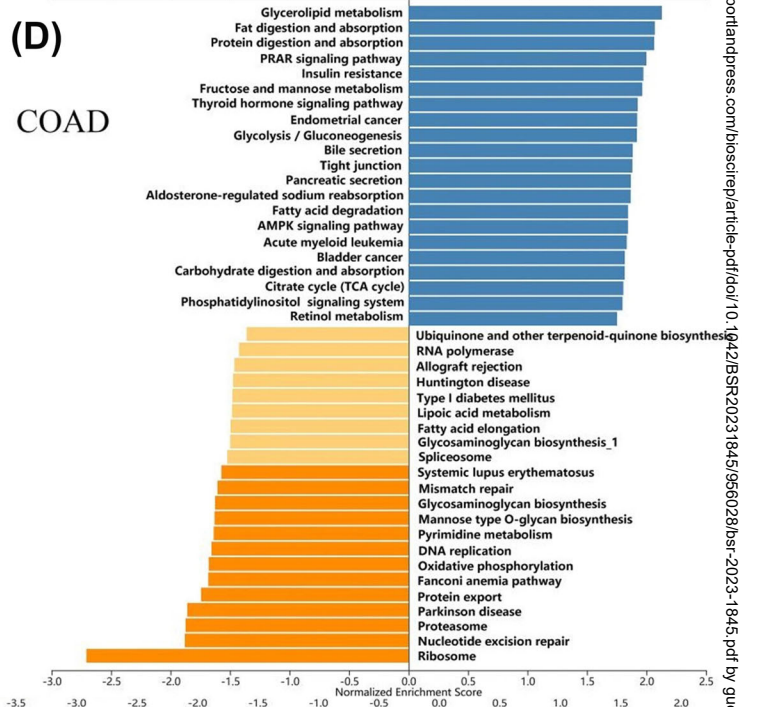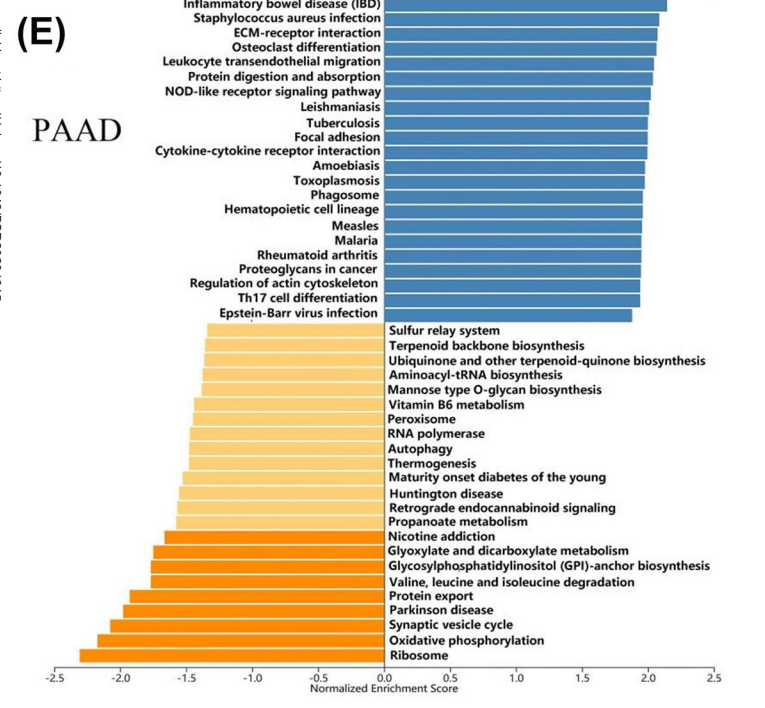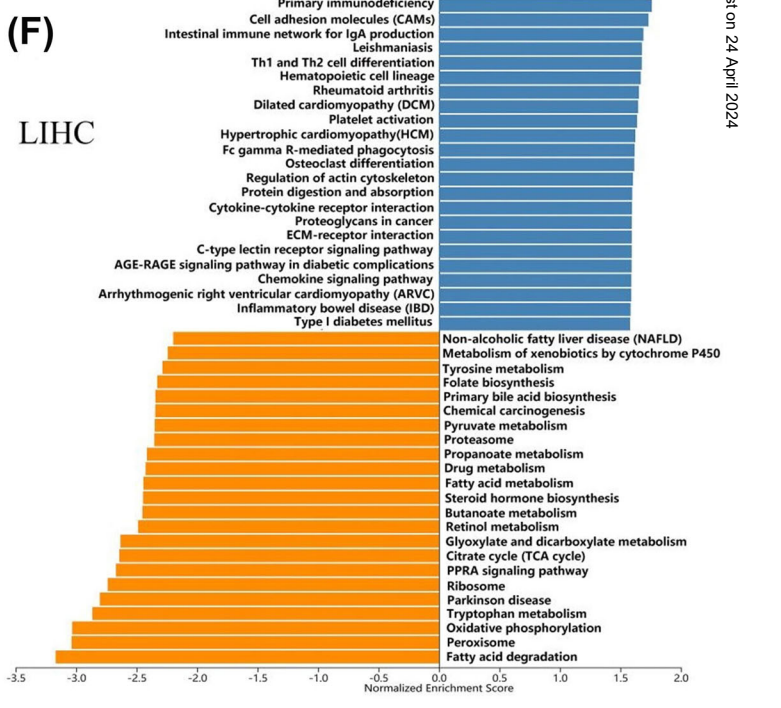

Downloaded from <http://portlandpress.com/bioscience/article-pdf/doi/10.1042/BSR20231845/958028/bsr-2023-1845.pdf> by guest on 24 April 2024

Bioscience Reports. This is an Accepted Manuscript. You are encouraged to use the Version of Record that, when published, will replace this version. The most up-to-date version is available at <https://doi.org/10.1042/BSR20231845>

**(A)**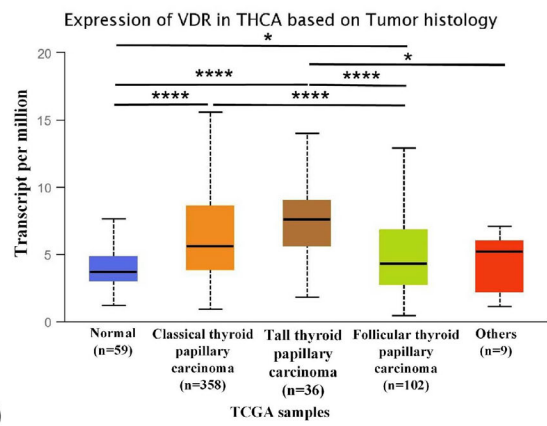**(B)**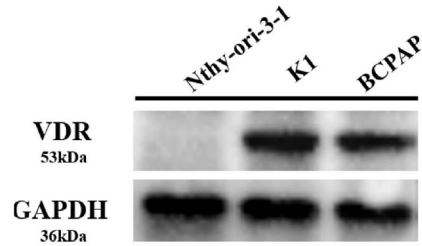**(D)**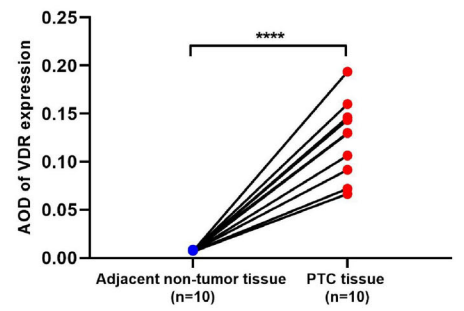**(C)**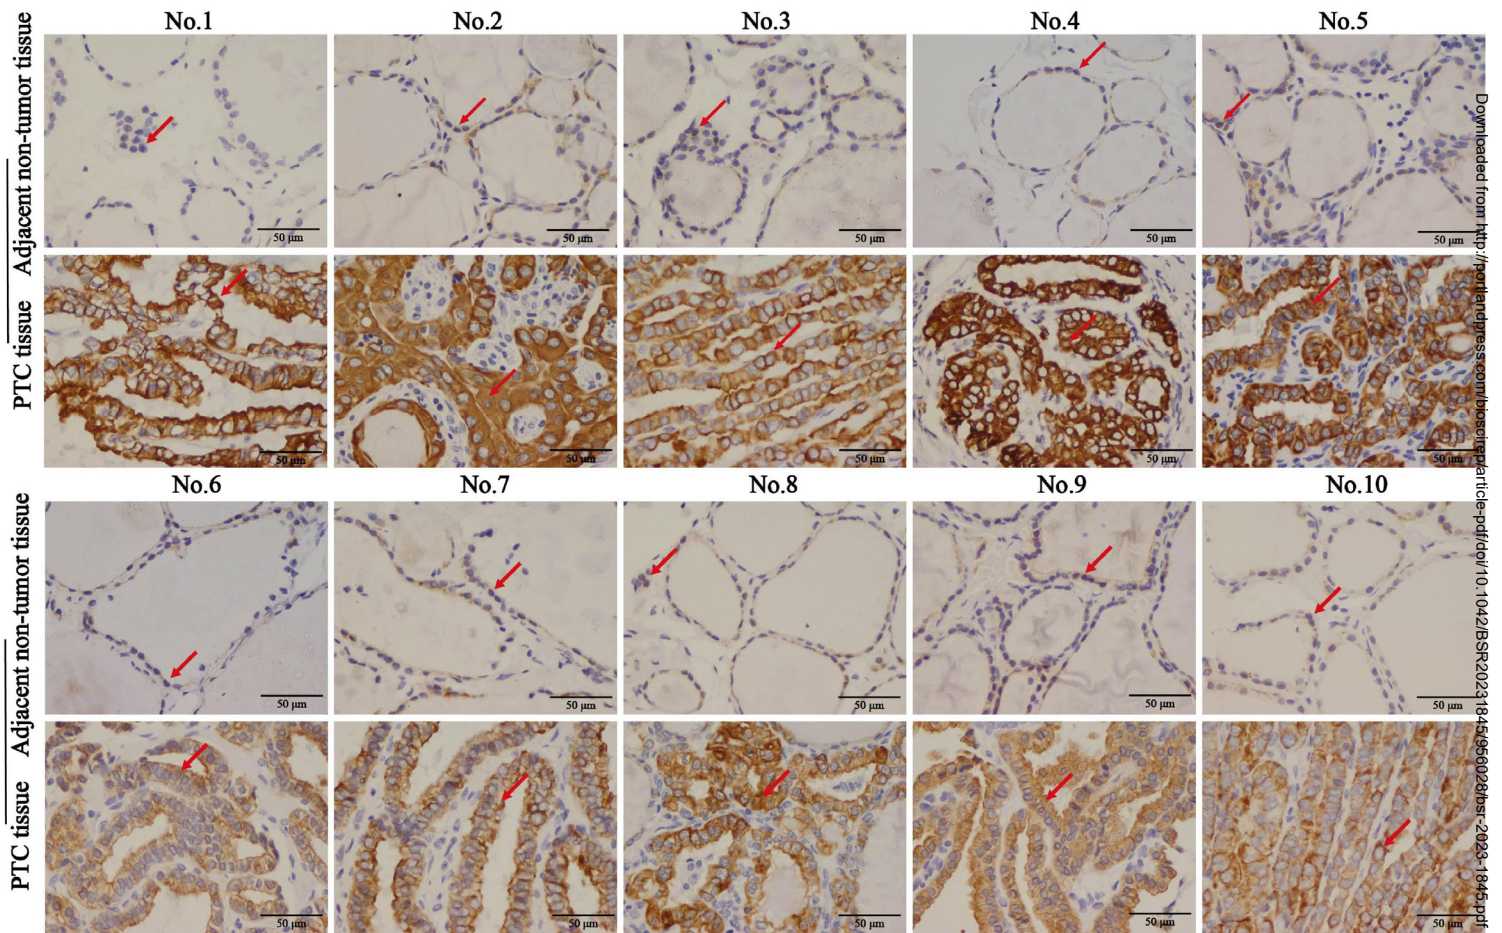**(E)**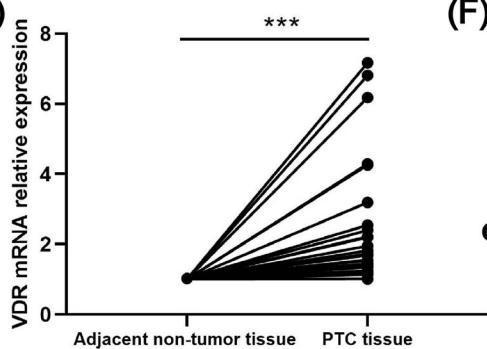**(F)**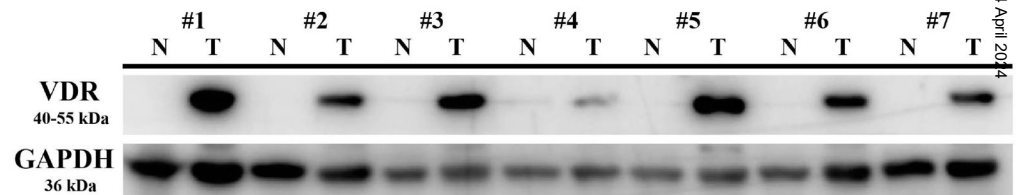**(G)**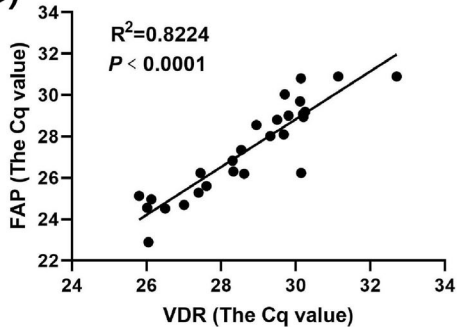**(H)**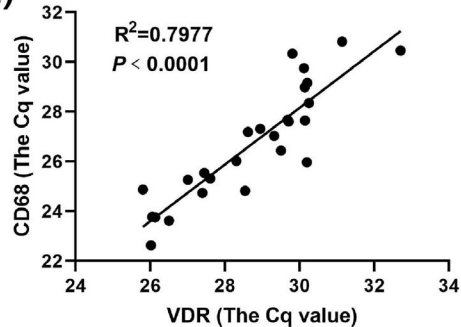**(I)**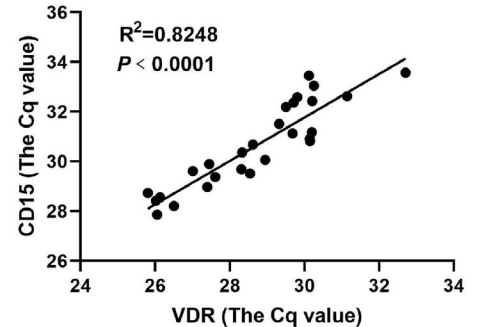

(A)

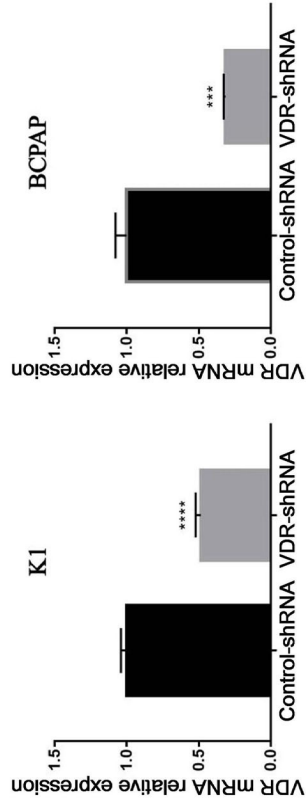

(B)

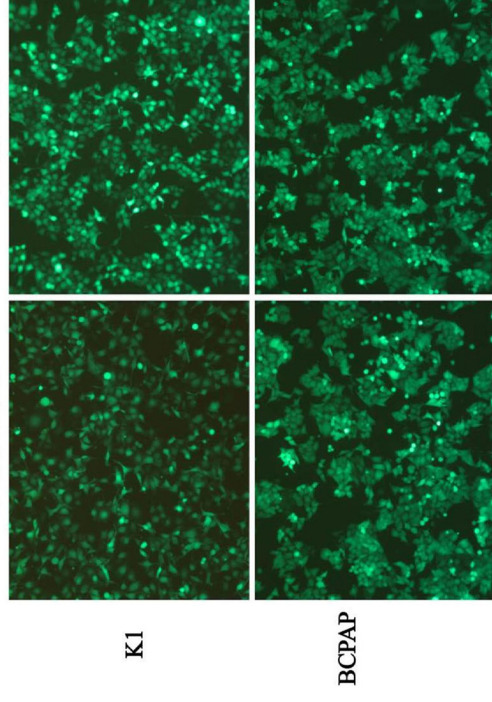

(C)

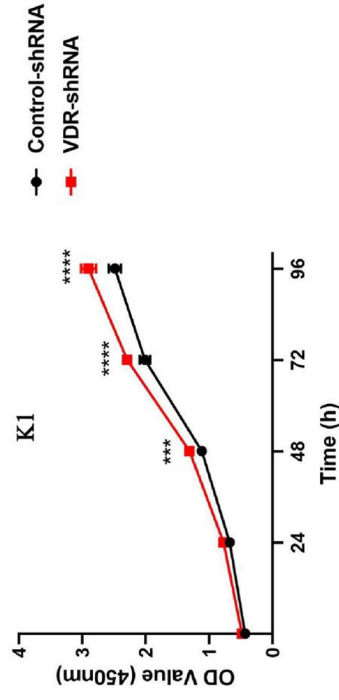

(D)

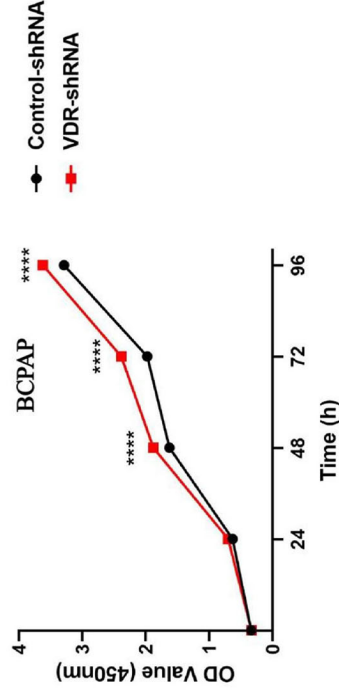

(E)

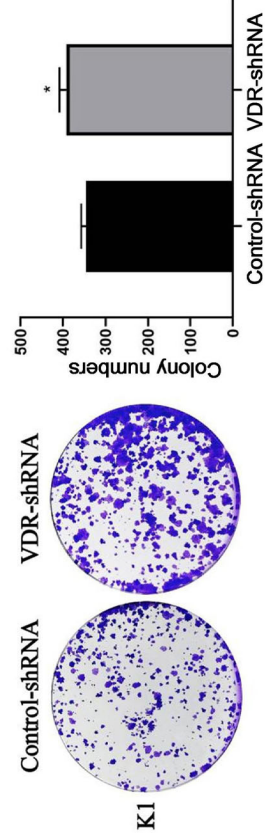

(F)

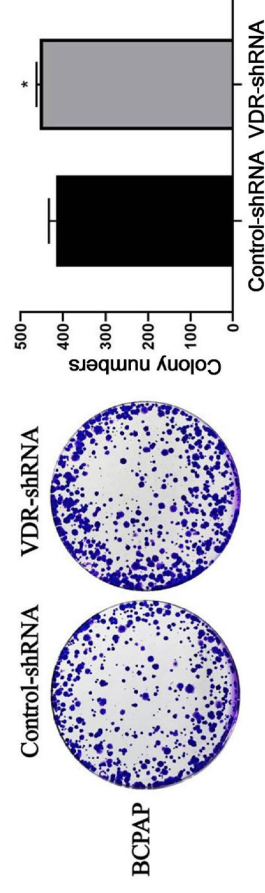

(G)

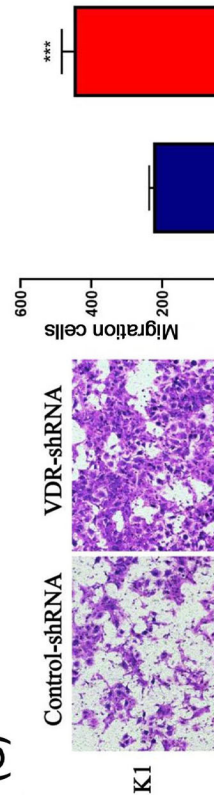

(H)

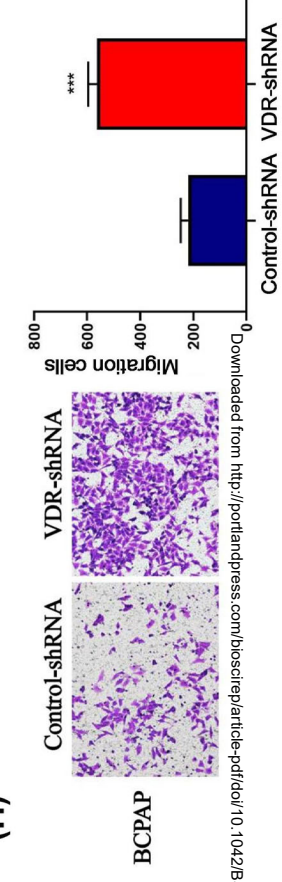

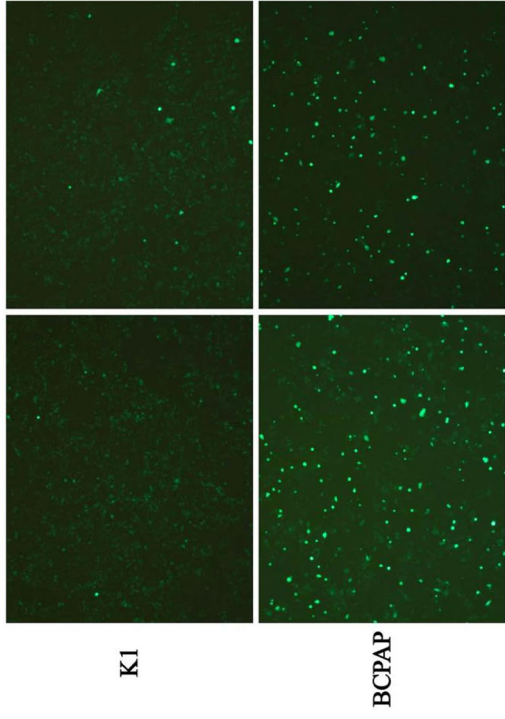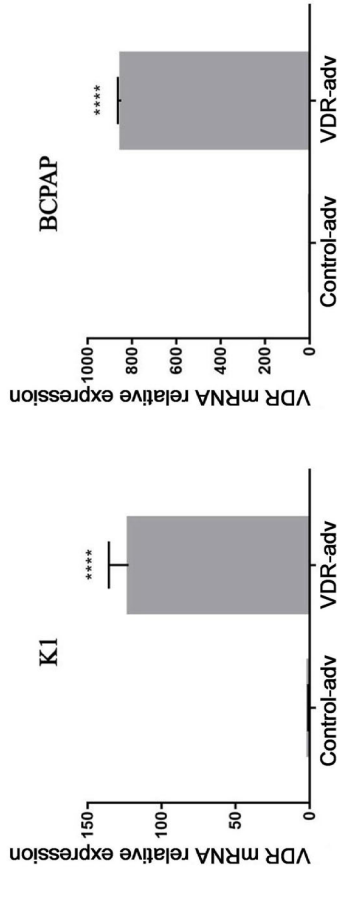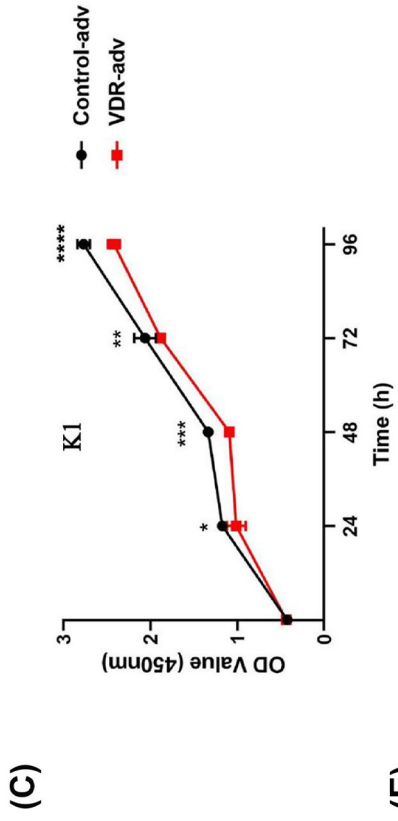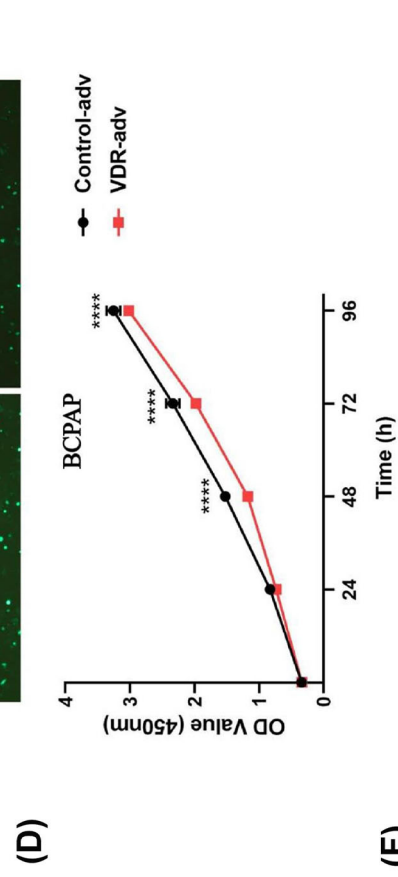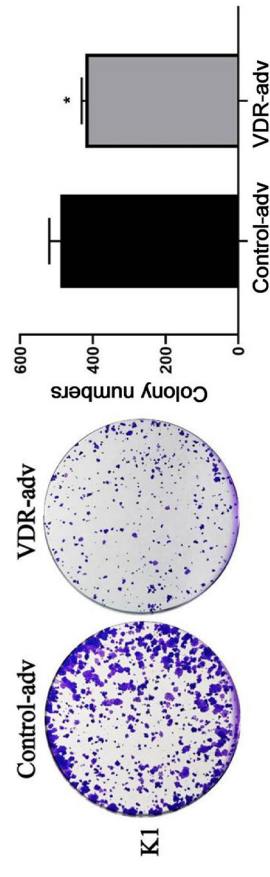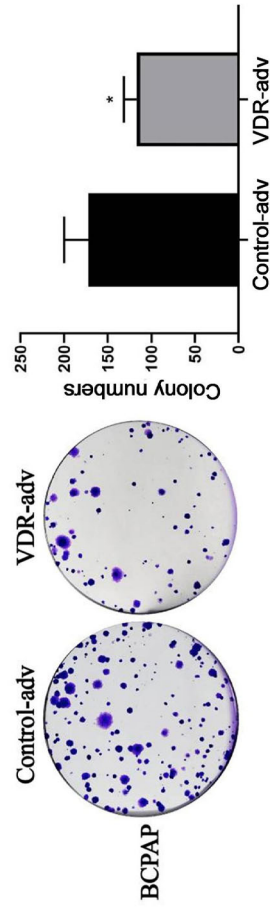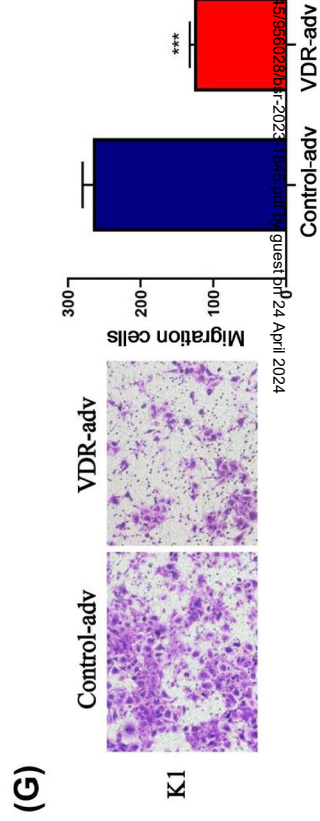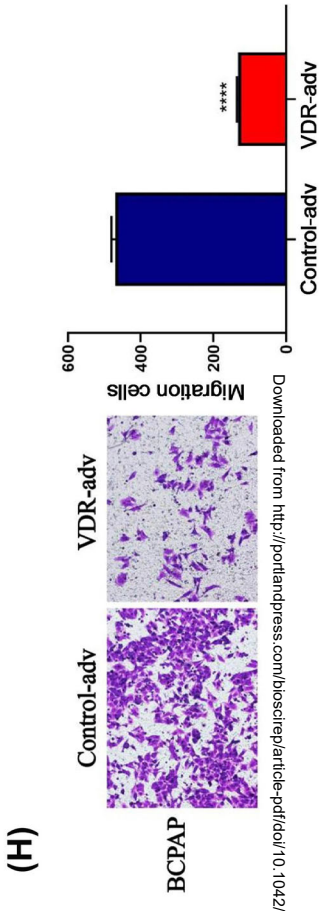

Source: https://port.silverchair.com/bioscirep/article-pdf/956028/bsr-2023-1845.pdf
